# Supplementary material for: Artificial nucleotide codons for enzymatic DNA synthesis
Source: Royal Society of Chemistry journal article supplement (doi:10.1039/d3cc04933g), 2023-01-01
Supplement: d3cc04933g1.pdf [file d3cc04933g1.pdf]

## Artificial nucleotide codons for enzymatic DNA synthesis

Nazarii Sabat,<sup>a</sup> Andreas Stämpfli,<sup>b</sup> Marie Flamme,<sup>a</sup> Steven Hanlon,<sup>c</sup> Serena Bisagni,<sup>c</sup> Filippo Sladojevich,<sup>b</sup> Kurt Püntener<sup>c</sup> and Marcel Hollenstein<sup>a\*</sup>

<sup>a</sup> Institut Pasteur, Université Paris Cité, CNRS UMR3523, Department of Structural Biology and Chemistry, Laboratory for Bioorganic Chemistry of Nucleic Acids, 28, rue du Docteur Roux, 75724 Paris Cedex 15, France

<sup>b</sup> Pharma Research and Early Development, Roche Innovation Center Basel, F. Hoffmann-La Roche Ltd, Grenzacherstrasse 124, 4070, Basel, Switzerland

<sup>c</sup> Pharmaceutical Division, Synthetic Molecules Technical Development, Process Chemistry & Catalysis, F. Hoffmann-La Roche Ltd, 4070 Basel, Switzerland

\* Corresponding Author: [marcel.hollenstein@pasteur.fr](mailto:marcel.hollenstein@pasteur.fr)

### Contents

|                                                                                      |           |
|--------------------------------------------------------------------------------------|-----------|
| <b>1. Materials and methods</b> .....                                                | <b>2</b>  |
| <b>2. Experimental section</b> .....                                                 | <b>3</b>  |
| 2.1 Synthesis of trinucleotide triphosphates. General procedure.....                 | 3         |
| 2.2 Copies of NMR Spectra .....                                                      | 8         |
| 2.3 Copies of HRMS Spectra .....                                                     | 11        |
| <b>3. Enzymatic reactions</b> .....                                                  | <b>14</b> |
| 3.1 Template-independent DNA extension reactions (TdT, PUP).....                     | 14        |
| 3.2 Template-dependent PEX reactions .....                                           | 15        |
| 3.3 Evaluation of stability of trinucleotide triphosphate dT <sub>3</sub> TP 4c..... | 19        |
| <b>4. LCMS analyses of enzymatic reactions</b> .....                                 | <b>23</b> |

## 1. Materials and methods

All reactions were performed under argon in flame-dried glassware. Anhydrous solvents and reagents for reactions were purchased from Sigma Aldrich and Alfa Aesar. Thymidine on solid support (5'-O-DMT-thymidine-3'-Icaa-CPG) was ordered from Biosynth. Thymidine phosphoramidite was purchased from ChemGenes and LNA-T phosphoramidite was obtained from Roche. NMR spectra were recorded on a Bruker Avance 500 spectrometer (500.1 MHz for  $^1\text{H}$ , 125.8 MHz for  $^{13}\text{C}$ , and 202.5 MHz for  $^{31}\text{P}$ ), and all spectra were referenced to the signals of the corresponding solvent. Chemical shifts are given in ppm ( $\delta$  scale) and coupling constants ( $J$ ) in Hz. The NMR signals were assigned using a combination of  $^1\text{H}$  and  $^{31}\text{P}$  experiments. High-resolution electrospray ionization (ESI) mass spectra (MS,  $m/z$ ) were recorded on a Waters Q-ToF Micro MS in the positive-ion electrospray ionization (ESI+) mode. Solutions were prepared using 1:1 MeCN/ $\text{H}_2\text{O}$  containing 0.1% formic acid or MeOH/water containing 10 mM ammonium acetate in the case of sensitive compounds. HPLC purification was performed using an Äkta™ pure system (GE Healthcare) equipped with Thermo Scientific™ DNAPac™ PA100 preparative ion exchange column (13  $\mu\text{m}$ , 250 x 22.0 mm). Oligonucleotides were purchased from Microsynth or Integrated DNA Technologies (IDT) companies. All the DNA and RNA polymerases (TdT, PUP, Hemo KlenTaq, *Taq*, Bst 2.0, *Sulfolobus* DNA Polymerase IV (Dpo4), Vent (*exo*), Deep Vent (*exo*), Klenow (*exo*), were purchased from New England Biolabs as well as the natural dNTPs. Acrylamide/bisacrylamide (29:1, 40%) was obtained from Fisher Scientific. Visualization of PAGE gels was performed by fluorescence imaging using Amersham Typhoon phosphorimager with the ImageQuantTL software (v.10.2) (both from Cytiva). The Amicon centrifuge filters (10 kDa) were purchased from Sigma Aldrich. Chromatographic separations for LCMS experiments were performed on a Thermo Scientific™ Vanquish™ Flex Binary UHPLC system (Thermo Fisher Scientific, Reinach, Switzerland). The column used for all separations was a Waters Aquity Premier BEH C18 Peptide 2.1\*50mm 1.7 $\mu\text{m}$  300A (Waters (CH) AG, Baden-Dättwil, Switzerland).

## 2. Experimental section.

### 2.1 Synthesis of trinucleotide triphosphates. General procedure.

5'-DMTr-protected thymidine on solid support **1** (1067.5 mg, 0.05 mmol) was loaded on the short column attached to the collecting waste flask under argon. All reagent solutions were flushed through the column by using controlled vacuum under argon flow (see Figure SI1). The synthesis started with the preparation of trinucleotide 5'-d(TTT)-3' **3a**, followed by triphosphorylation, and finished with simultaneous global deprotection and solid support removal (see Figure 2).

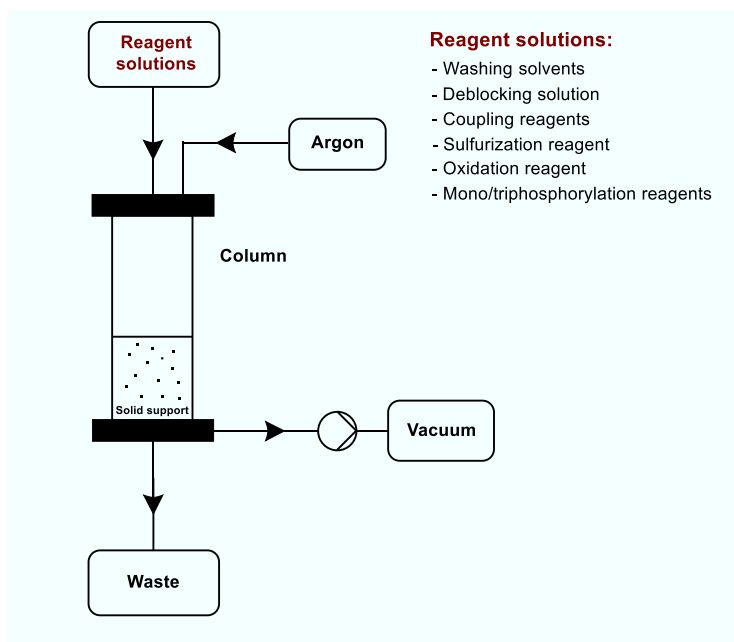

**Figure SI1.** Schematic representation of manual column synthesis device.

Prior to the synthetic sequence, all of the following reagent solutions, as well as solvents, were prepared and kept dried under argon and molecular sieves:

*Deblocking solution (1X):* TFA 3% (0.3 mL TFA in 9.7 mL MeCN);

*Coupling solution (1X):* Phosphoramidite reagent 100 mM (0.5 mmol (10 equiv.) in 5 mL MeCN);

*Coupling activator solution (1X):* 5-(Ethylthio)-1H-tetrazole (ETT), 250 mM (0.5 mmol (10 equiv.) in 2 mL MeCN);

*Oxidation solution (1X):* I<sub>2</sub> (10 equiv.) 127 mg in 5 mL THF/Py/H<sub>2</sub>O (7:2:1);

*Sulfurization solution (1X):* Beaucage reagent (3H-1,2-Benzodithiol-3-one 1,1-dioxide) (10 equiv.) 100 mg in 5 mL of Py;

*Monophosphorylation solution:* 2-Chloro-1,3,2-benzodioxaphosphorin-4-one (10 equiv.) 101 mg in 5 mL MeCN;

*Triphosphorylation solution:* Tributylammonium pyrophosphate (10 equiv.) 274 mg in 3 mL of Bu<sub>3</sub>N/DMF (1:2).

The synthetic sequence (Figure 2) was performed as follows:

1. Thymidine on solid support **1** (0.05 mmol) was washed with 10-20 mL of MeCN.
2. *1<sup>st</sup> Deblocking* step to remove DMTr group. The column was slowly (10 min) flushed with 3% TFA solution in MeCN (10 mL). Then carefully washed with 10-20 mL of MeCN.
3. *1<sup>st</sup> Coupling* step. Nucleoside phosphoramidite reagent (0.5 mmol in 5 mL of MeCN, 100 mM solution) was mixed with ETT activator (0.5 mmol in 2 mL of MeCN, 250 mM solution) under argon and subsequently added to the column. The column was slowly (10 min) flushed with this solution. Then washed with 10-20 mL of MeCN.
4. *Oxidation or Sulfurization*. The column was flushed with the *oxidation solution* (5 mL of I<sub>2</sub> solution in THF/Py/H<sub>2</sub>O (7:2:1) or *sulfurization solution* (5 mL of Beaucage reagent solution in Py). Then washed with 10-20 mL of MeCN.
5. *2<sup>nd</sup> Deblocking* step to remove DMTr group. The column was slowly (10 min) flushed with 3% TFA solution in MeCN (10 mL). Then carefully washed with 10-20 mL of MeCN.
6. *2<sup>nd</sup> Coupling* step. Nucleoside phosphoramidite reagent (0.5 mmol in 5 mL of MeCN, 100 mM solution) was mixed with ETT activator (0.5 mmol in 2 mL of MeCN, 250 mM solution) under argon and subsequently added to the column. The column was slowly (10 min) flushed over with this solution. Then washed with 10-20 mL of MeCN.
7. *Oxidation or Sulfurization*. The column was flushed with the *oxidation solution* (5 mL of I<sub>2</sub> solution in THF/Py/H<sub>2</sub>O (7:2:1) or *sulfurization solution* (5 mL of Beaucage reagent solution in Py). Then washed with 10-20 mL of MeCN.
8. *3<sup>rd</sup> Deblocking* step to remove DMTr group. The column was slowly (10 min) flushed with 3% TFA solution in MeCN (10 mL). Then carefully washed with 10-20 mL of MeCN.  
*Monophosphorylation* step. The column was slowly (10 min) flushed with 5 mL of Py/MeCN (1:5). Then, slowly (10 min) flushed with *monophosphorylation solution* (2-Chloro-1,3,2-benzodioxaphosphorin-4-one in 5 mL MeCN);  
*Triphosphorylation* step. The column was washed with 5 mL of DMF. Then slowly (10 min) flushed with *triphosphorylation solution* (Tributylammonium pyrophosphate in 3 mL of Bu<sub>3</sub>N/DMF (1:2)). Then washed with 10-20 mL of MeCN.
9. *Oxidation*. The column was flushed with the *oxidation solution* (5 mL of I<sub>2</sub> solution in THF/Py/H<sub>2</sub>O (7:2:1)). Then washed with 10-20 mL of MeCN.
10. *Global deprotection and solid support removal*. The trinucleotide triphosphate on solid support was removed from the column and stirred for 2 hours in the mixture of aqueous NH<sub>4</sub>OH/MeNH<sub>2</sub> (10 mL, 1:1). The mixture was filtered on sintered glass filters and re-filtered *via* a syringe filter, then concentrated under vacuum.
11. *HPLC Purification*. The crude was re-dissolved in water (2 mL) and purified by HPLC using a preparative ion exchange column (Buffer A: 10 mM TEAB to Buffer B: 1 M TEAB). Finally, the collected aqueous solution was freeze-dried, yielding the corresponding trinucleotide triphosphate as yellowish solids.

## Solid-phase synthesis of trimer triphosphates (dT<sub>3</sub>TPs)

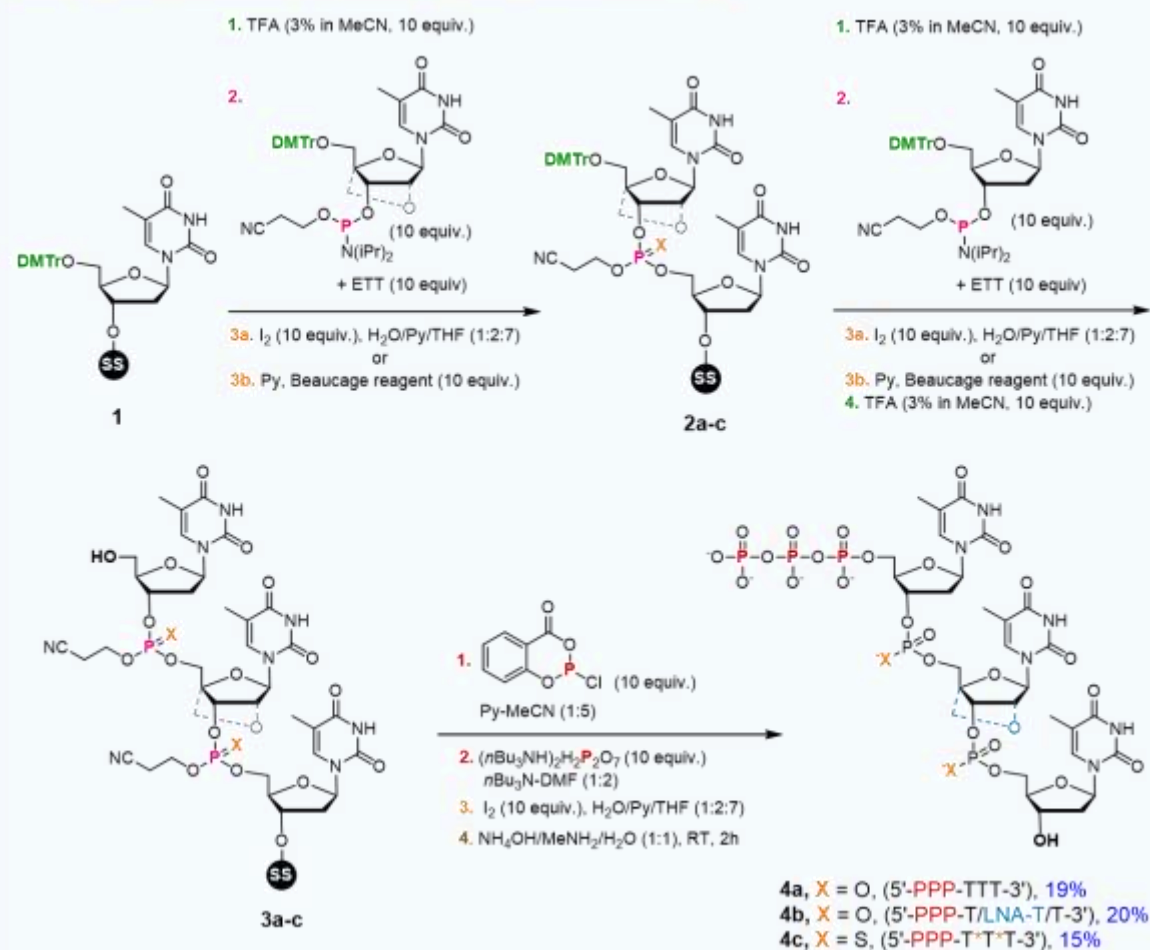

**Figure 2.** Solid-phase synthesis of trimer triphosphates (dT<sub>3</sub>TPs).

### Trinucleotide-5'-O-triphosphate **4a**

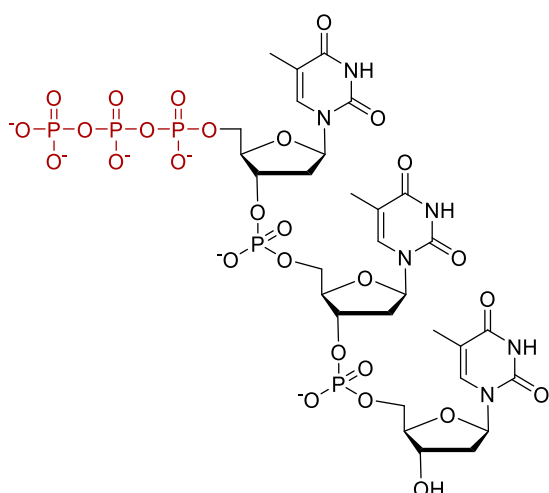

Trinucleotide triphosphate **4a** (10.4 mg, 10  $\mu$ mol, 19%) was prepared according to the general procedure.  $^1\text{H}$  NMR (500 MHz,  $\text{D}_2\text{O}$ ) 7.57 (d,  $J = 1.0$  Hz, 1H), 7.55 (d,  $J = 1.5$  Hz, 1H), 7.51 (d,  $J = 1.0$  Hz, 1H), 6.19 – 6.12 (m, 3H), 4.27 – 4.24 (m, 2H), 4.19 – 4.16 (m, 2H), 4.07 – 4.05 (m, 2H), 4.02 – 3.94 (m, 6H), 2.38 – 2.36 (m, 3H), 2.23 – 2.20 (m, 3H), 1.78 (d,  $J = 1.2$  Hz, 3H), 1.76 (d,  $J = 1.1$  Hz, 3H), 1.74 (d,  $J = 1.1$  Hz, 3H).  $^{31}\text{P}$  NMR (203 MHz,  $\text{D}_2\text{O}$ )  $\delta$  -1.23 (s, 1P); -1.36 (s, 1P), -6.28 (d,  $J = 18.5$  Hz, 1P), -11.57 (d,  $J = 19.1$  Hz, 1P), -22.19 (m, 1P). HRMS calcd. for  $\text{C}_{30}\text{H}_{41}\text{N}_6\text{O}_{28}\text{P}_5$  [M-2H] $^{2-}$ : 1088.0668, found: 1088.0680.

### LNA-trinucleotide-5'-O-triphosphate **4b**

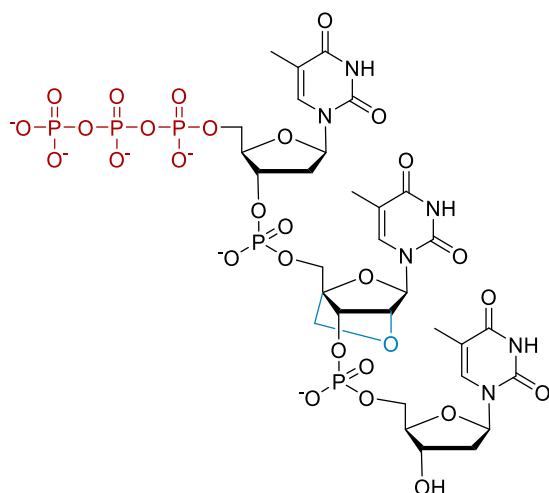

Trinucleotide triphosphate **4b** (11.2 mg, 10  $\mu$ mol, 20%) was prepared according to the general procedure.  $^1\text{H}$  NMR (500 MHz,  $\text{D}_2\text{O}$ ) 7.65 (d,  $J = 1.3$  Hz, 1H), 7.63 (d,  $J = 1.5$  Hz, 1H), 7.50 (d,  $J = 1.7$  Hz, 1H), 6.19 – 6.16 (m, 2H), 5.53 (s, 1H), 4.84 – 4.82 (m, 1H), 4.56 (s, 1H), 4.42 – 4.39 (m, 2H), 4.32 (d,  $J = 5.5$  Hz, 1H), 4.30 – 4.29 (m, 1H), 4.26 – 4.23 (m, 2H), 4.08 – 4.06 (m, 2H), 4.04 – 4.01 (m, 2H), 3.98 – 3.93 (m, 2H), 2.42 – 2.37 (m, 3H), 2.24 – 2.19 (m, 1H), 2.15 – 2.10 (m, 1H), 1.77 (d,  $J = 1.0$  Hz, 3H), 1.73 (d,  $J = 1.2$  Hz, 3H), 1.69 (d,  $J = 1.1$  Hz, 3H).  $^{31}\text{P}$  NMR (203 MHz,  $\text{D}_2\text{O}$ )  $\delta$  -1.32 (s, 1P); -2.00 (s, 1P), -9.73 (m, 1P), -11.63 (d,  $J = 19.2$  Hz, 1P), -22.68 (m, 1P). HRMS calcd. for  $\text{C}_{31}\text{H}_{41}\text{N}_6\text{O}_{29}\text{P}_5$  [M-2H] $^{2-}$ : 1116.0617, found: 1116.0622.

### Phosphorothioate-trinucleotide-5'-O-triphosphate **4c**

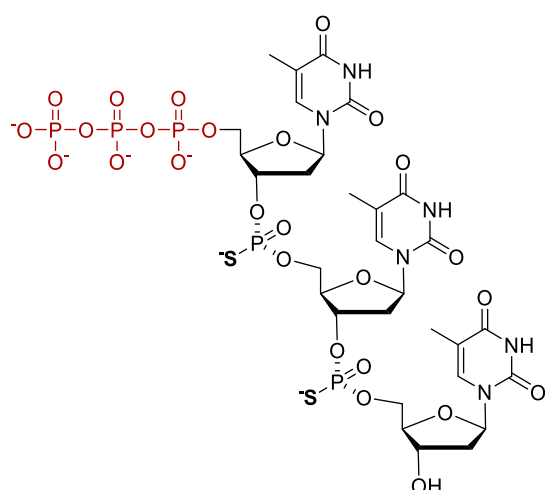

Trinucleotide triphosphate **4c** (8.4 mg, 8  $\mu$ mol, 15%) was prepared according to the general procedure.  $^1\text{H}$  NMR (500 MHz,  $\text{D}_2\text{O}$ ) 7.66 – 7.60 (m, 3H), 6.19 – 6.14 (m, 3H), 4.98 – 4.92 (m, 2H), 4.46 – 4.45 (m, 1H), 4.29 – 4.26 (m, 2H), 4.08 – 4.02 (m, 7H), 2.43 – 2.38 (m, 3H), 2.25 – 2.18 (m, 3H), 1.81 – 1.78 (m, 9H),  $^{31}\text{P}$  NMR (203 MHz,  $\text{D}_2\text{O}$ )  $\delta$  55.21 (m, 1P); 54.96 (m, 1P), 0.45 (d,  $J$  = 20.4 Hz, 1P), -11.87 (d,  $J$  = 18.9 Hz, 1P), -22.84 (t,  $J$  = 20.1 Hz, 1P). HRMS calcd. for

$\text{C}_{30}\text{H}_{41}\text{N}_6\text{O}_{26}\text{P}_5\text{S}_2$   $[\text{M}-2\text{H}]^{2-}$ : 1120.0211, found: 1120.0208.

## 2.2 Copies of NMR Spectra

### $^1\text{H}$ NMR ( $\text{D}_2\text{O}$ , 500 MHz) spectrum of Trinucleotide-5'-O-triphosphate 4a

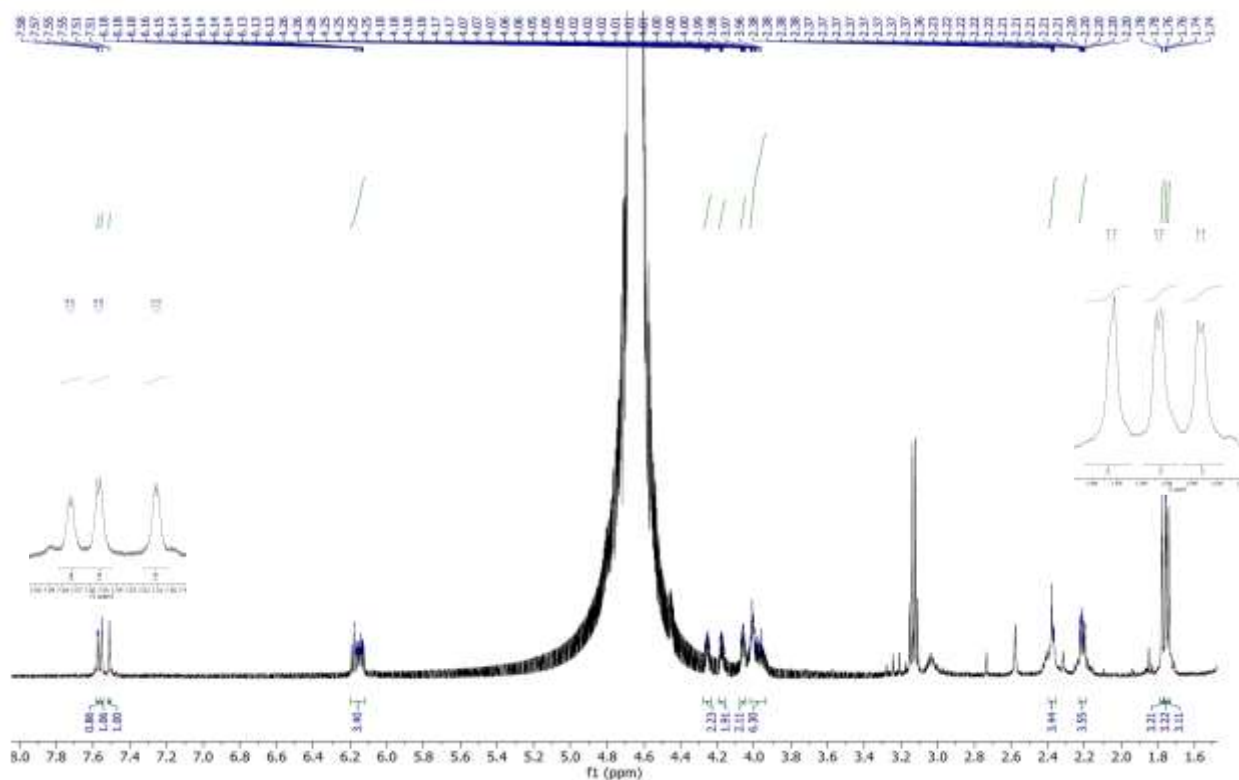

### $^{31}\text{P}$ NMR ( $\text{D}_2\text{O}$ , 203 MHz) spectrum of Trinucleotide-5'-O-triphosphate 4a

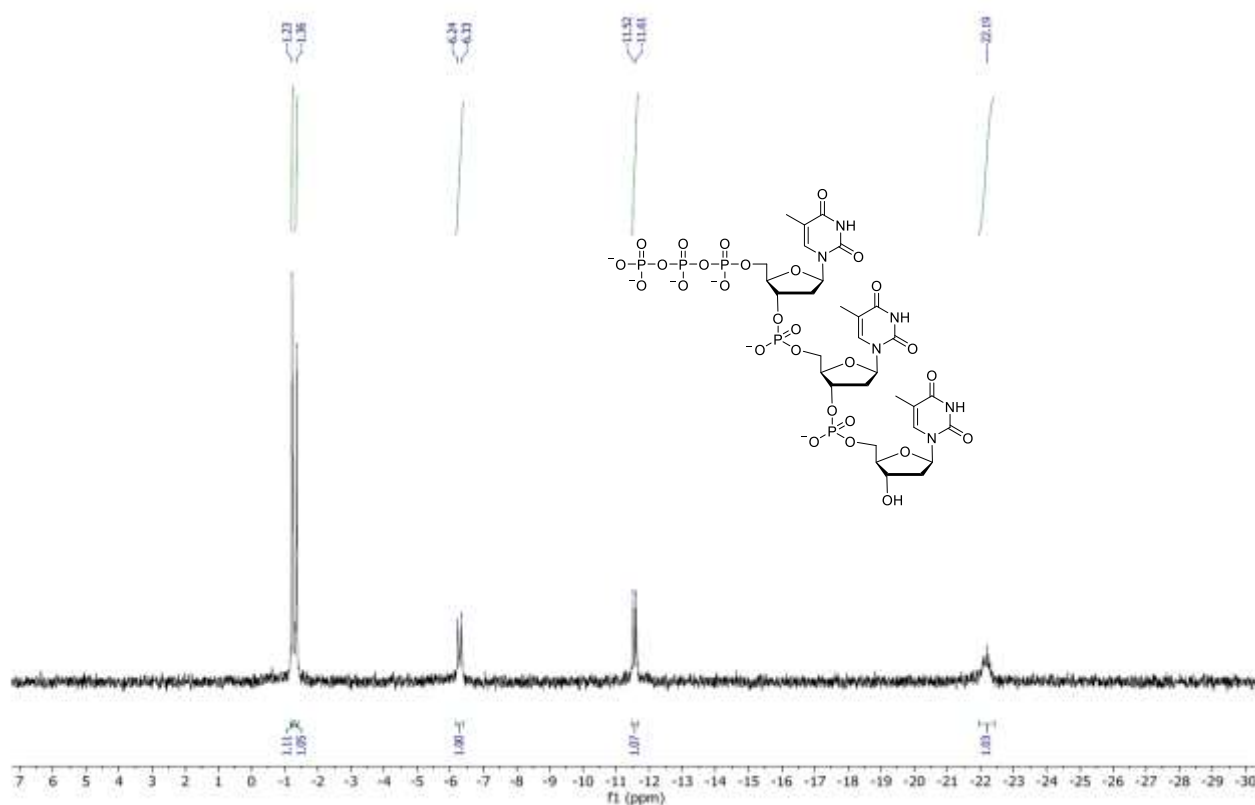



**$^1\text{H}$  NMR ( $\text{D}_2\text{O}$ , 500 MHz) spectrum of LNA-trinucleotide-5'-O-triphosphate 4b**

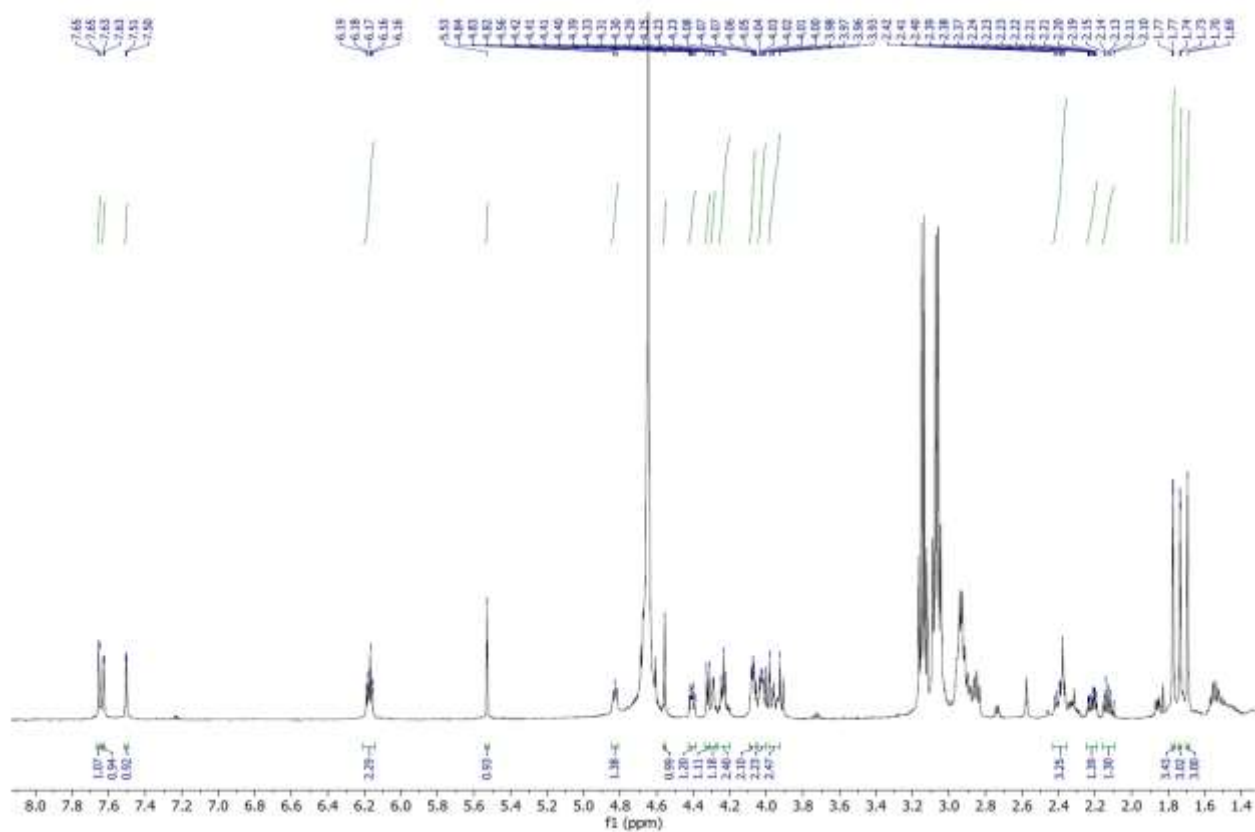

**$^{31}\text{P}$  NMR ( $\text{D}_2\text{O}$ , 203 MHz) spectrum of LNA-trinucleotide-5'-O-triphosphate 4b**

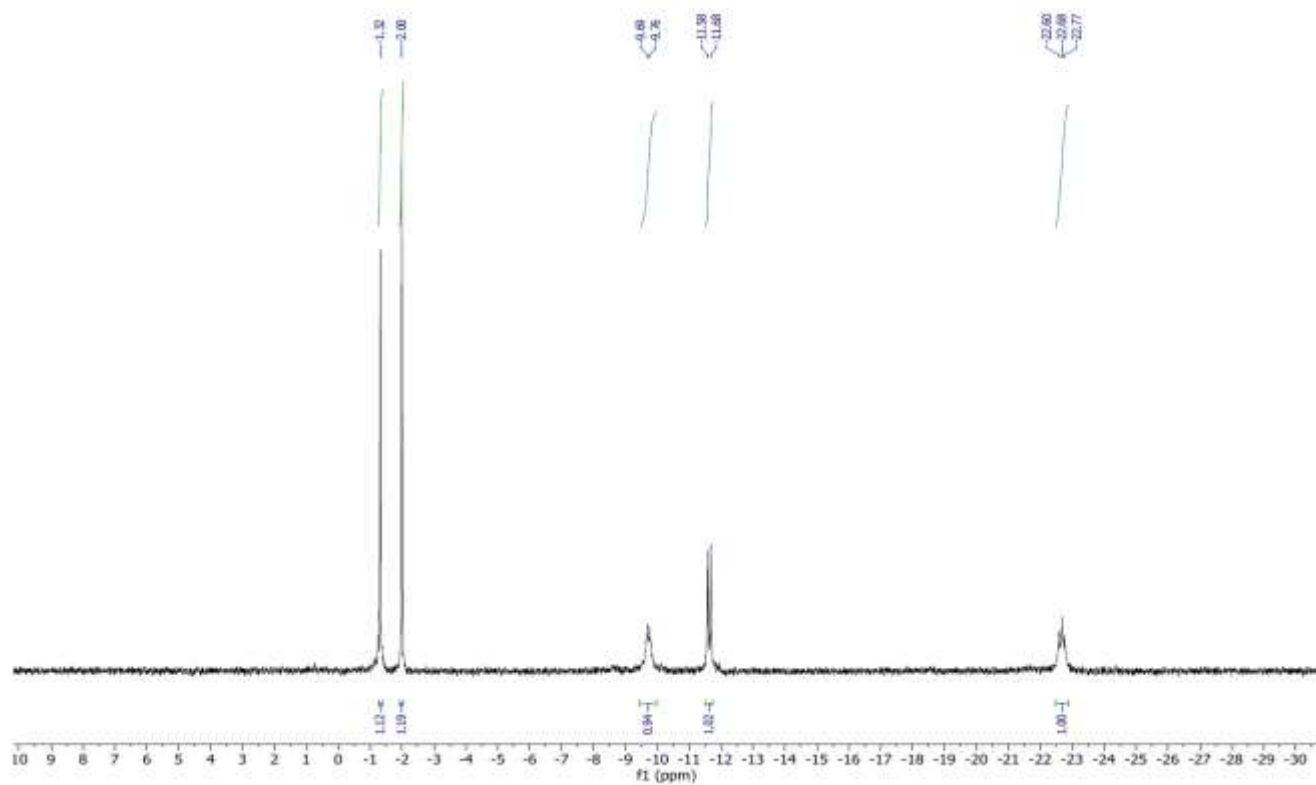

**<sup>1</sup>H NMR (D<sub>2</sub>O, 500 MHz) spectrum of Thioate-trinucleotide-5'-O-triphosphate 4c**

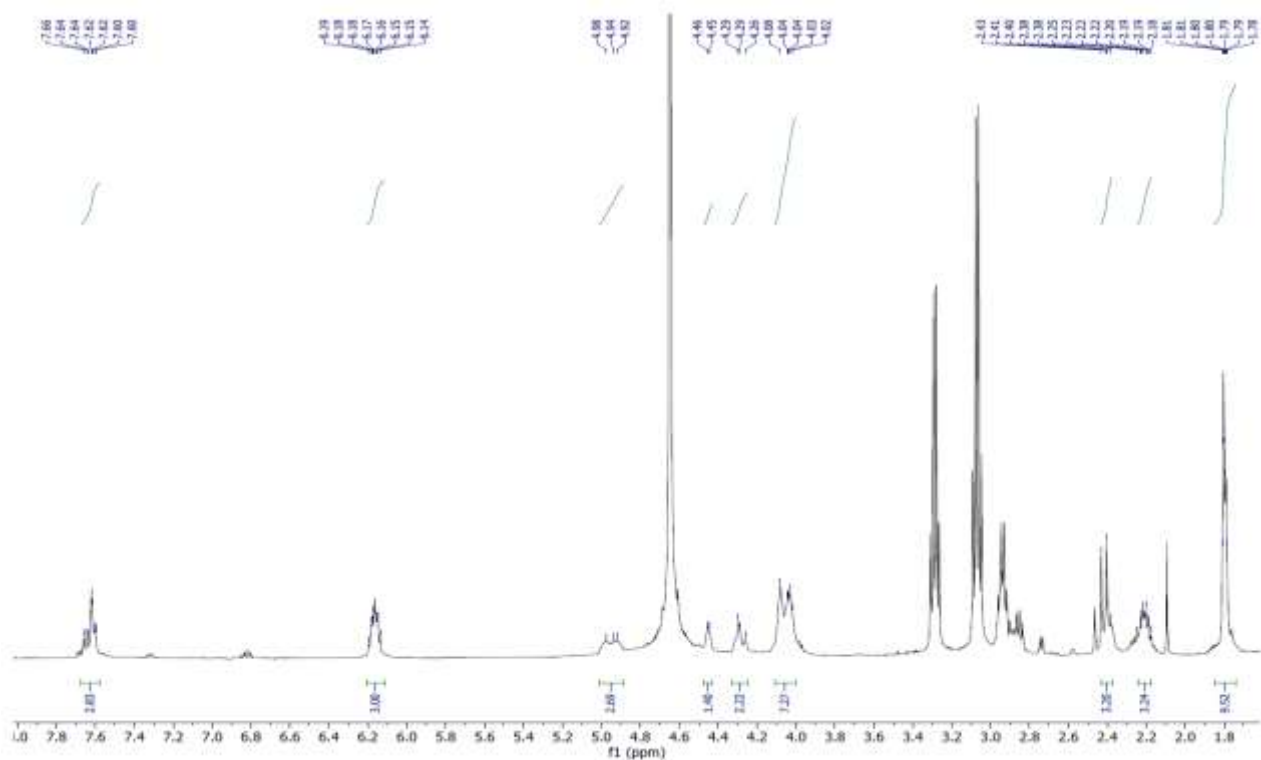

**<sup>31</sup>P NMR (D<sub>2</sub>O, 203 MHz) spectrum of Thioate-trinucleotide-5'-O-triphosphate 4c**

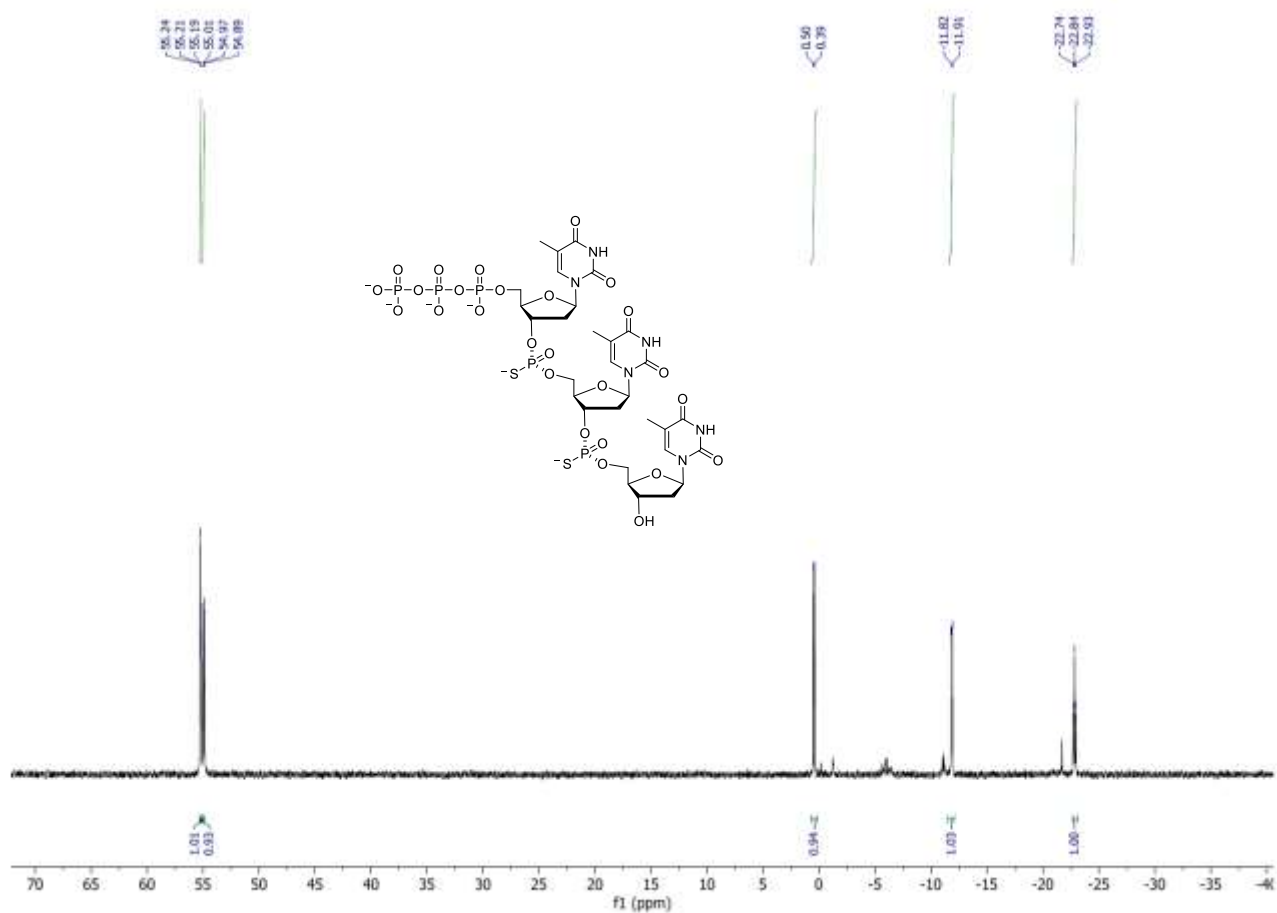

## 2.3 Copies of HRMS Spectra

### Trinucleotide-5'-O-triphosphate 4a

HRMS calcd. for  $C_{30}H_{41}N_6O_{28}P_5$   $[M-2H]^{2-}$ : 1088.0668, found: 1088.0680.

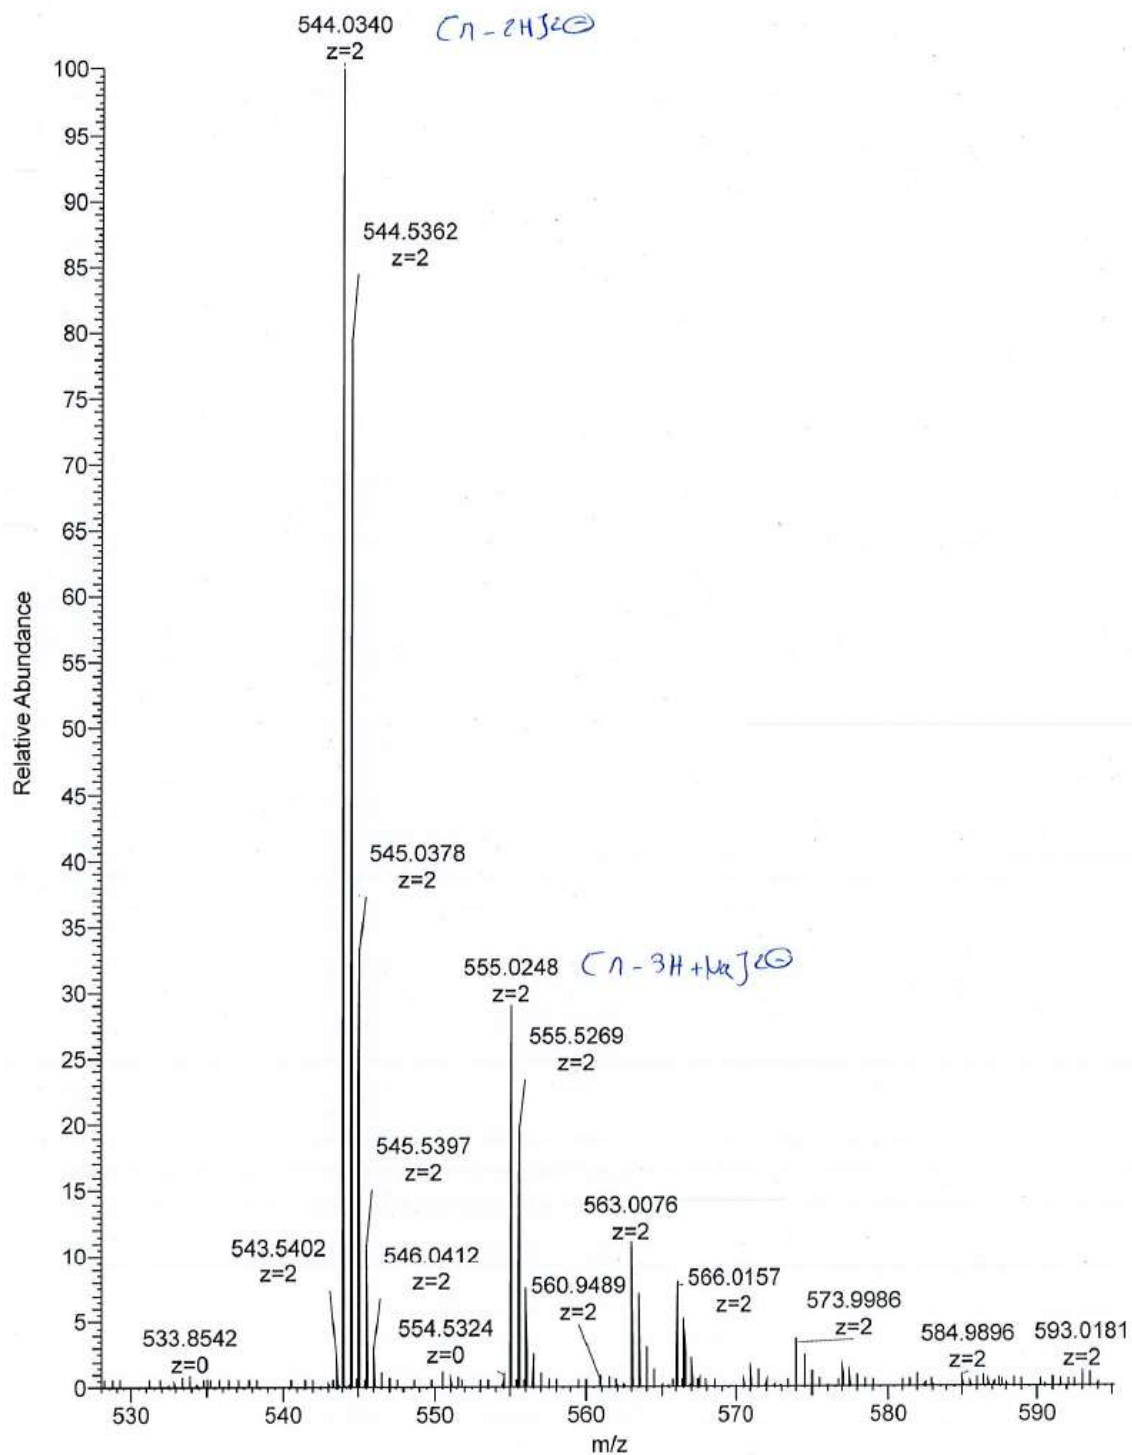

### LNA-trinucleotide-5'-O-triphosphate 4b

HRMS calcd. for  $C_{31}H_{41}N_6O_{29}P_5$   $[M-2H]^{2-}$ : 1116.0617, found: 1116.0622.

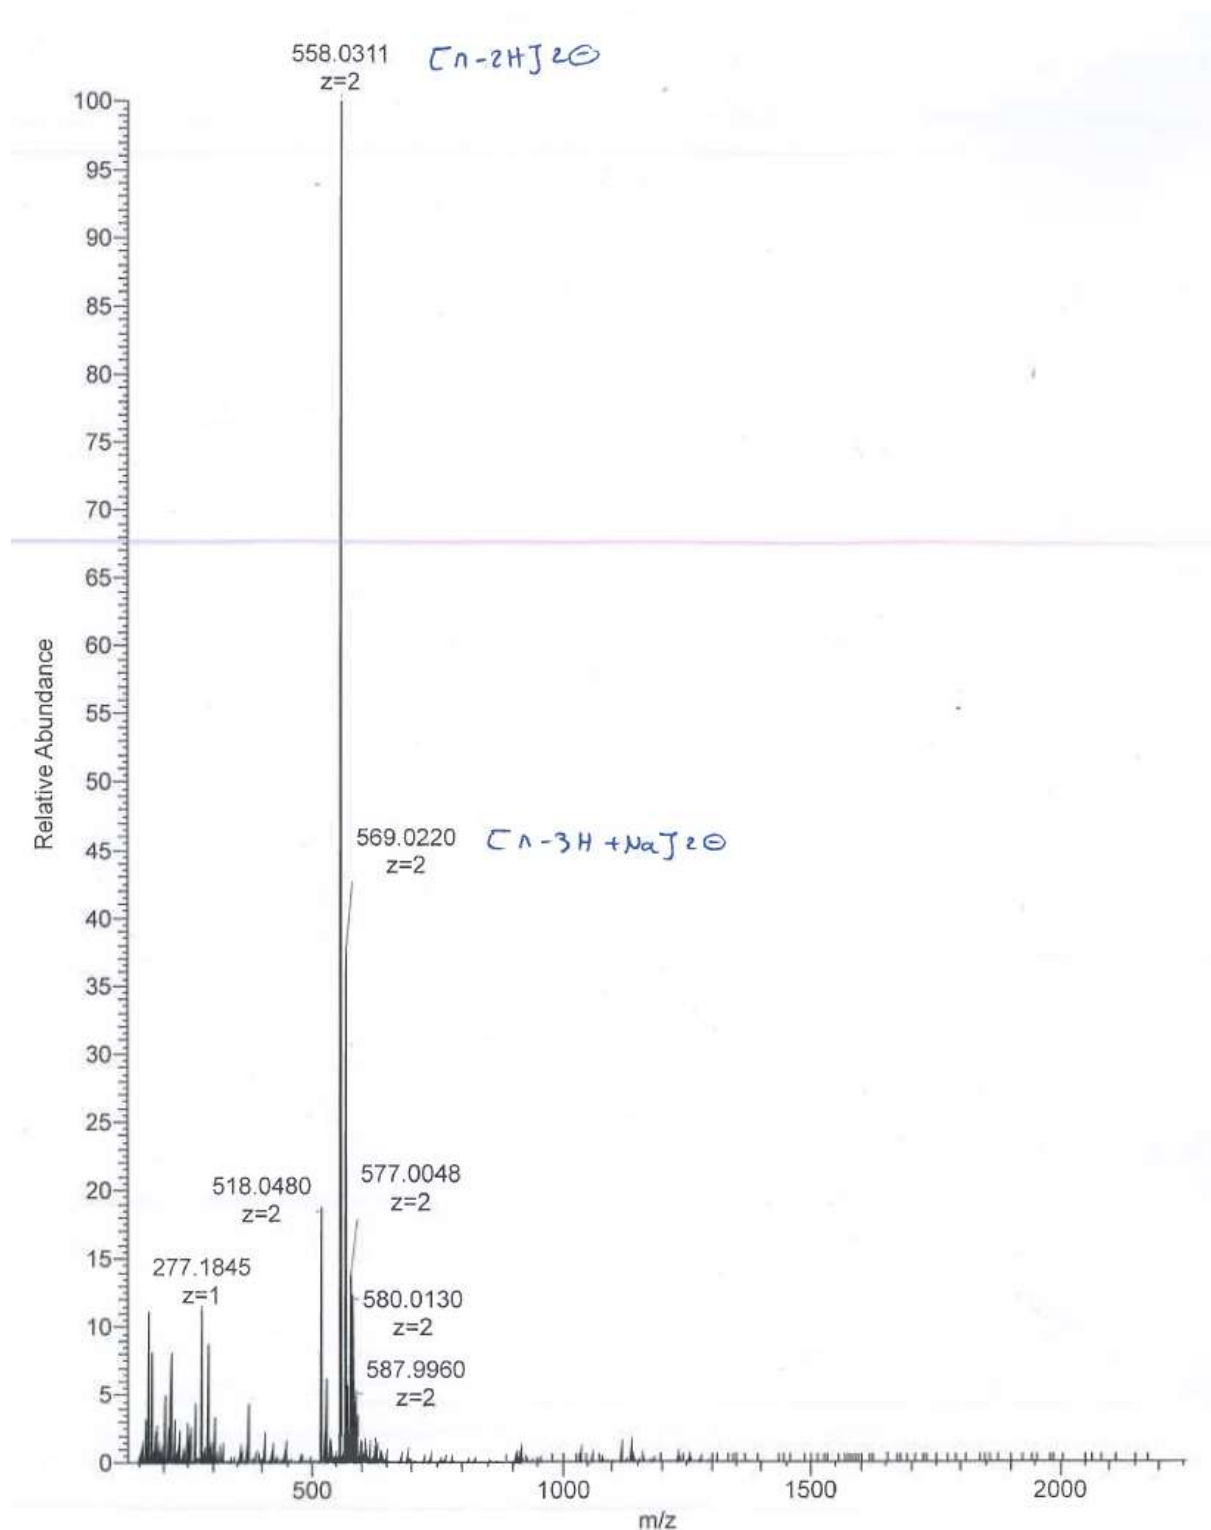

### Phosphorothioate trinucleotide-5'-O-triphosphate 4c

HRMS calcd. for  $C_{30}H_{41}N_6O_{26}P_5S_2$   $[M-2H]^{2-}$ : 1120.0211, found: 1120.0208.

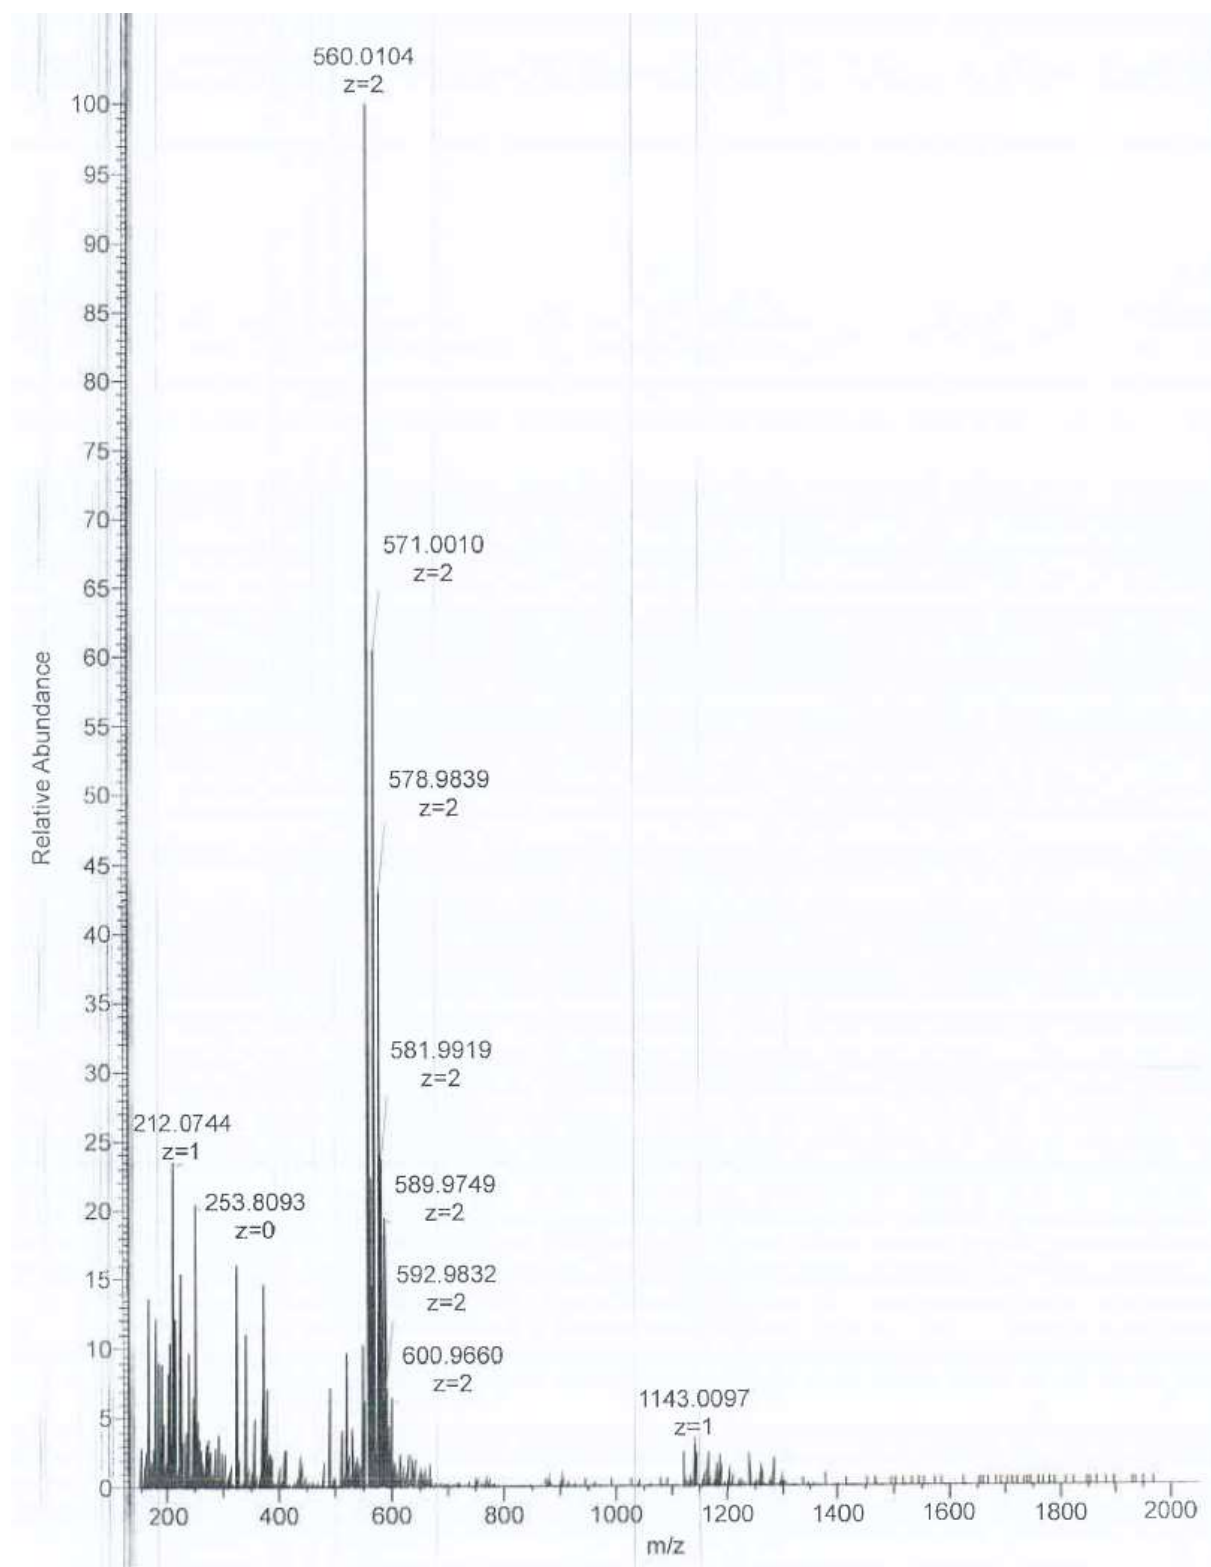

### 3. Enzymatic reactions

#### 3.1 Template-independent DNA extension reactions (TdT, PUP)

##### *TdT reactions of DNA primer P1 with dT<sub>3</sub>TPs 4a-c*

DNA primer **P1**: 5'- FAM-TAC GAC TCA CTA TAG CCT C -3' (19 nt); MW: 6244.

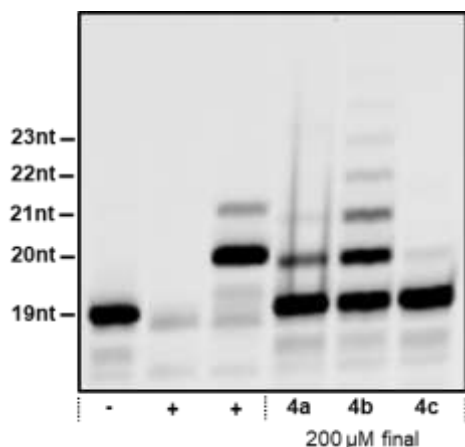

**Figure SI2.** Gel image (PAGE 20%) for analysis of TdT reactions. (-) – negative control in the absence of TdT enzyme; first from the left (+) – positive control using dTTP; second from the left (+) – positive control using (LNA-T)TP; (**4a-c**) – dT<sub>3</sub>TPs (200 μM final).

**Analytical scale reaction conditions (10 μL):** DNA Primer **P1** 10μM (1 μL), dT<sub>3</sub>TPs **4a-c** 1mM (2 μL), TdT buffer 10X (1 μL), Water (4 μL), TdT enzyme (0.5 μL), TIPP (0.5 μL), MnCl<sub>2</sub> 10 mM (1 μL). Reaction mixtures were incubated at 37 °C for 3 hours.

##### *PUP reactions of RNA primer P2 with dT<sub>3</sub>TPs 4a-c*

RNA primer **P2**: 5'- FAM-rCrArG rUrCrG rGrArU rCrGrC rArGrU rCrArG (18 nt), MW: 6308.

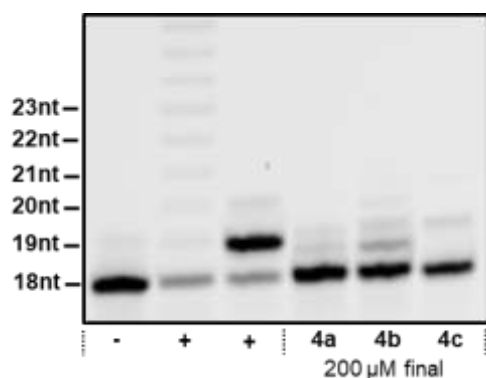

**Figure SI3.** Gel image (PAGE 20%) for analysis of PUP reactions. (-) – negative control in the absence of PUP enzyme; first from the left (+) – positive control using UTP; second from the left (+) – positive control using (LNA-T)TP; (**4a-c**) – dT<sub>3</sub>TPs (200 μM final).

**Analytical scale reaction conditions (10 μL):** RNA Primer **P2** 10μM (2 μL), dT<sub>3</sub>TPs **4a-c** 1mM (2 μL), NEBuffer 2 10X (1 μL), Water (3 μL), PolyU Polymerase (0.5 μL), RNase Inhibitor Murine (0.5 μL), MnCl<sub>2</sub> 10 mM (1 μL). Reaction mixtures were incubated at 37 °C for 3 hours.

### 3.2 Template-dependent PEX reactions

#### **PEX reactions of DNA primer P3 on DNA templates T1-T2 with dT<sub>3</sub>TPs 4a-c**

DNA primer **P3**: 5'- FAM-CAT GGG CGG CAT GGG -3' (15 nt); MW: 5211.

DNA Template **T1**: 5'- (AAA)<sub>4</sub> CCC ATG CCG CCC ATG -3' (27 nt); MW: 8228.

DNA Template **T2**: 5'- GTC AAA CCC TGG AAA CGT AAA CGC AAA GG AAA CCC ATG CCG CCC ATG -3' (47 nt); MW: 14405.

**Analytical scale general reaction conditions (10 µL):** DNA Primer **P3** 10µM (1 µL), DNA Template **T1-T2** 10µM (1.5 µL), Water (0.5 µL) were mixed and hybridized. Next, other components of the reaction were added depending on the DNA polymerase used:

- a) HemoKlen Taq** polymerase (1 µL), Hemo KlenTaq buffer 5X (2 µL), dT<sub>3</sub>TPs **4a-c** 1mM (2 µL), Water (2 µL). Reaction mixtures were incubated at 60 °C for 30 min;
- b) Bst 2.0** polymerase (1 µL), Isothermal buffer 10X (1 µL), dT<sub>3</sub>TPs **4a-c** 1mM (2 µL), Water (2 µL). Reaction mixtures were incubated at 60 °C for 30 min;
- c) Vent (exo)** polymerase (1 µL), Thermopol buffer 10X (1 µL), dT<sub>3</sub>TPs **4a-c** 1mM (2 µL), Water (2 µL). Reaction mixtures were incubated at 60 °C for 30 min;
- d) Taq** polymerase (1 µL), Standard *Taq* buffer 10X (1 µL), dT<sub>3</sub>TPs **4a-c** 1mM (2 µL), Water (2 µL). Reaction mixtures were incubated at 60 °C for 30 min;
- e) Sulfolobus** polymerase (1 µL), Thermopol buffer 10X (1 µL), dT<sub>3</sub>TPs **4a-c** 1mM (2 µL), Water (2 µL). Reaction mixtures were incubated at 55 °C for 30 min;
- f) Deep Vent (exo)** polymerase (1 µL), Thermopol buffer 10X (1 µL), dT<sub>3</sub>TPs **4a-c** 1mM (2 µL), Water (2 µL). Reaction mixtures were incubated at 55 °C for 30 min;
- g) Klenow (exo)** polymerase (1 µL), NEBuffer 2 10X (1 µL), dT<sub>3</sub>TPs **4a-c** or **dTTP** or **α-thio-TTP** 1mM (2 µL), Water (2 µL). Reaction mixtures were incubated at 37 °C for 30 min.

**Preparative scale general reaction conditions (100 µL):** DNA Primer **P3** 100µM (5 µL), DNA Template **T1-T2** 100µM (7.5 µL), Water (5.0 µL) were mixed and hybridized. Next, other components of the reaction were added depending on the DNA polymerase used:

- a) Taq** polymerase (20 µL), Standard *Taq* buffer 10X (10 µL), dT<sub>3</sub>TPs **4a-c** 5mM (20 µL), Water (32.5 µL). Reaction mixtures were incubated at 60 °C for 30 min;
- b) Klenow (exo)** polymerase (20 µL), NEBuffer 2 10X (10 µL), dT<sub>3</sub>TPs **4a-c** or **dTTP** or **α-thio-TTP** 5mM (20 µL), Water (32.5 µL). Reaction mixtures were incubated at 37 °C for 30 min.

After incubation, the reaction mixture was diluted with water to 500 µL final volume. Then washed and concentrated using an Amicon Ultra centrifugal filter (10kDa). The resulting DNA concentrate was used for further LCMS analysis.

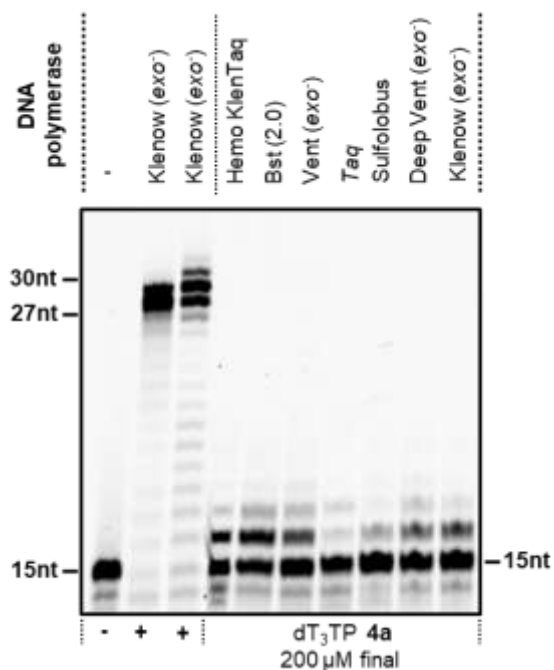

**Figure SI4A.** Gel image (PAGE 20%) for analysis of PEX reactions of DNA primer **P3** on DNA template **T1** with dT<sub>3</sub>TP **4a** (200 μM final) over 30 minutes. (-) – negative control in the absence of DNA polymerase; first from the left (+) – positive control using dTTP (Klenow *exo'*); second from the left (+) – positive control using α-thio-TTP (Klenow *exo'*).

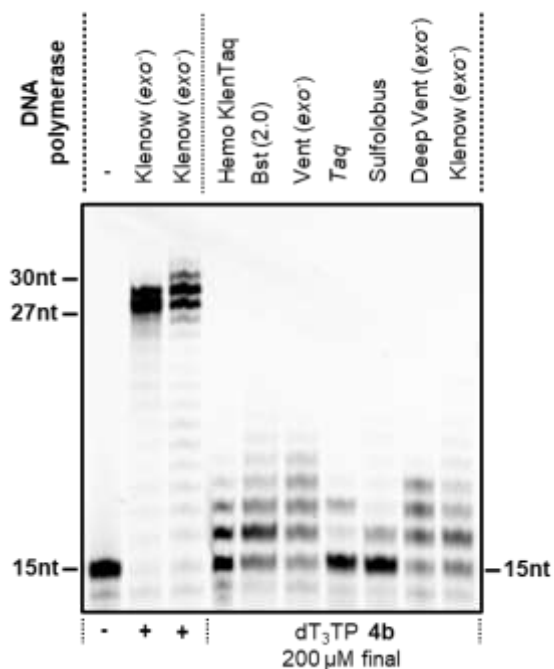

**Figure SI4B.** Gel image (PAGE 20%) for analysis of PEX reactions of DNA primer **P3** on DNA template **T1** with dT<sub>3</sub>TP **4b** (200 μM final) over 30 minutes. (-) – negative control in the absence of DNA polymerase; first from the left (+) – positive control using dTTP (Klenow *exo'*); second from the left (+) – positive control using α-thio-TTP (Klenow *exo'*).



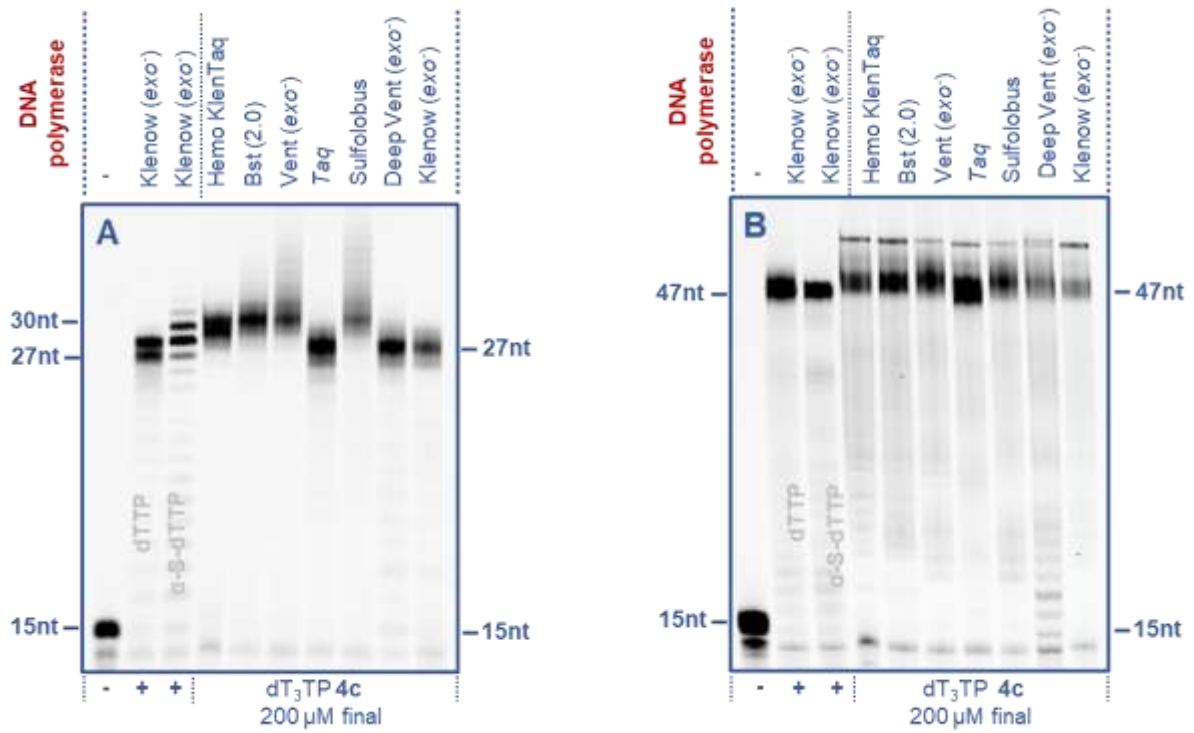

**Figure 3A-B.** Gel image (PAGE 20%) for analysis of PEX reactions of DNA primer **P3** on DNA Templates **T1-T2** with **dT<sub>3</sub>TP 4c** (200 μM final) over 30 minutes. (-) – negative control in the absence of DNA polymerase; first from the left (+) – positive control using dTTP (Klenow *exo*<sup>+</sup>); second from the left (+) – positive control using α-thio-TTP (Klenow *exo*<sup>-</sup>).

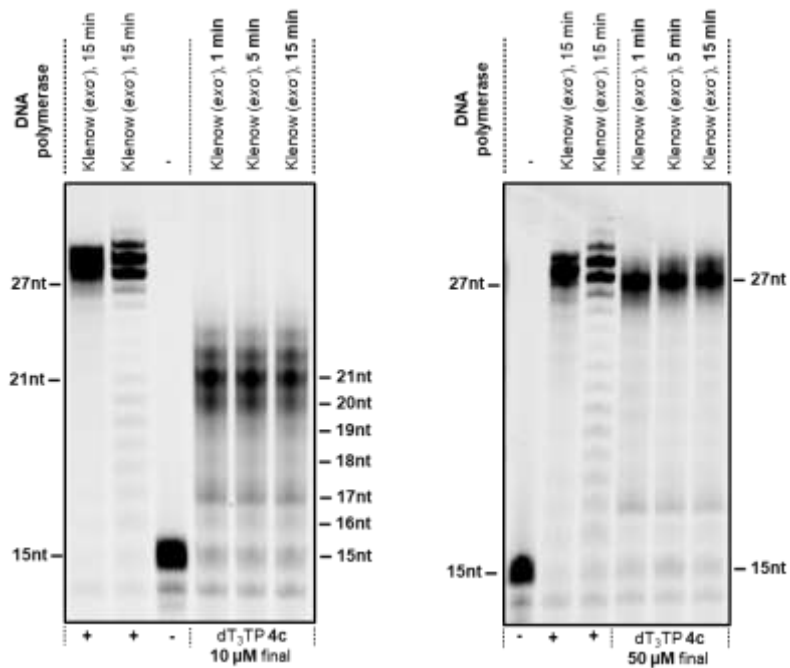

**Figure SI5.** Gel image (PAGE 20%) for analysis of PEX reactions of DNA primer **P3** on DNA Template **T1** with **dT<sub>3</sub>TP 4c** (10 and 50  $\mu$ M final) over 1-15 min timeframe. (-) – negative control in the absence of DNA polymerase; first from the left (+) – positive control using dTTP (Klenow *exo*); second from the left (+) – positive control using  $\alpha$ -thio-TTP (Klenow *exo*).

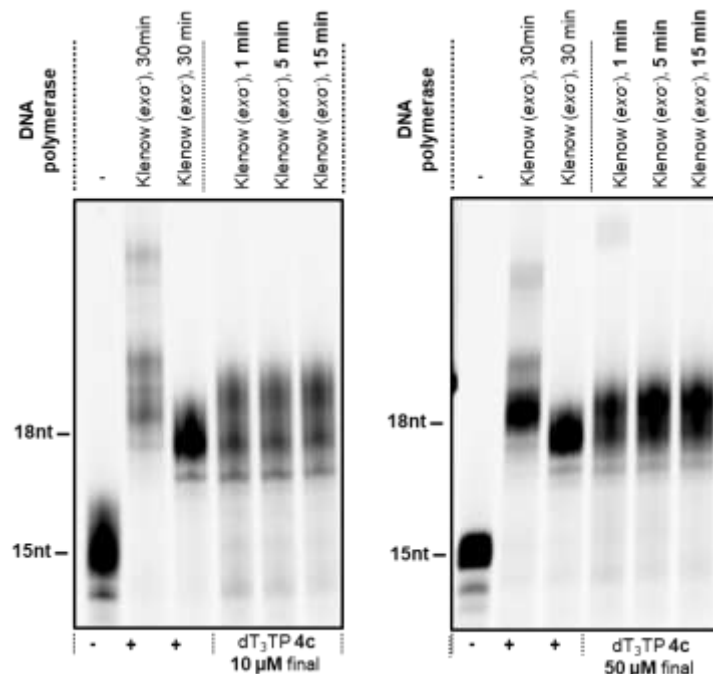

**Figure SI6.** Gel image (PAGE 20%) for analysis of PEX reactions of DNA primer **P3** on DNA Template **T2** with **dT<sub>3</sub>TP 4c** (10 and 50  $\mu$ M final) over 1-15 min timeframe. (-) – negative control in the absence of DNA polymerase; first from the left (+) – positive control using dTTP (Klenow *exo*); second from the left (+) – positive control using  $\alpha$ -thio-TTP (Klenow *exo*).

### 3.3 Evaluation of stability of trinucleotide triphosphate dT<sub>3</sub>TP 4c

We first analyzed pure dTTP and dT<sub>3</sub>TP 4c by running analytical ion exchange HPLC (using an Äkta™ pure system GE Healthcare equipped with Thermo Scientific™ DNAPac™ PA100 column, Buffer A: 10 mM TEAB to 100% Buffer B: 1 M TEAB) (Figures SI7-8). We next incubated a 10 µL of a 1 mM solution of dT<sub>3</sub>TP 4c in the presence of 5 µL of the (Klenow exo<sup>-</sup>) DNA polymerase and 5 µL of NEB2 buffer at 37°C for either 5 min or 1 hour. Then we analyzed directly the crude reaction mixtures by analytical ion exchange HPLC (Figures SI9-10). To conclude, under these reaction conditions, we did not observe the formation of dTTP or other degradation products suggesting that dT<sub>3</sub>TP 4c is not readily degraded.

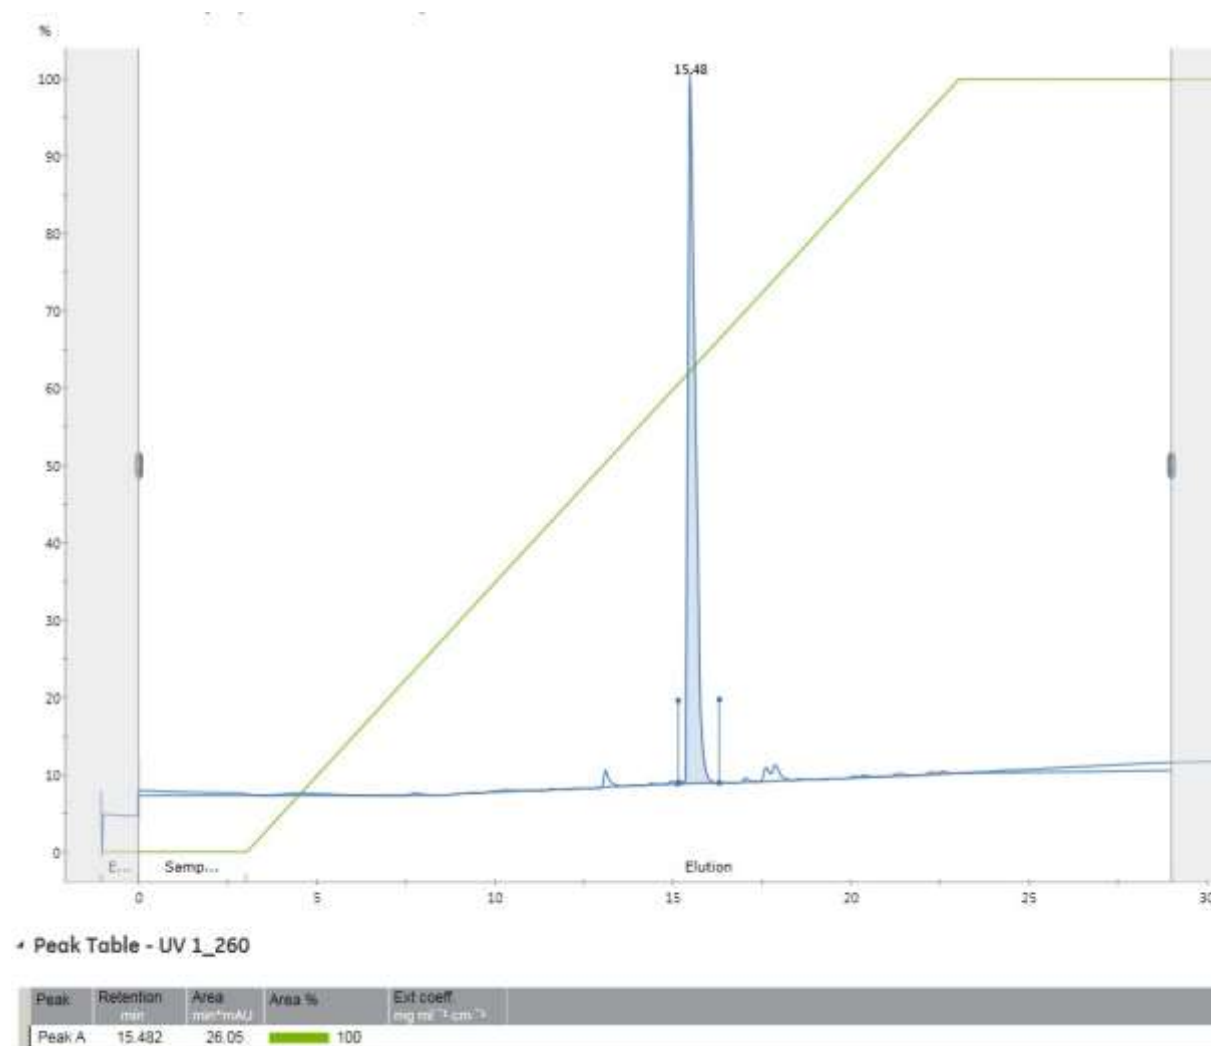

**Figure SI7.** HPLC trace of dTTP. Peak A (100%), RT (15.5 min). (Y-Axis): Buffer A (10 mM TEAB) to 100% Buffer B (1 M TEAB).

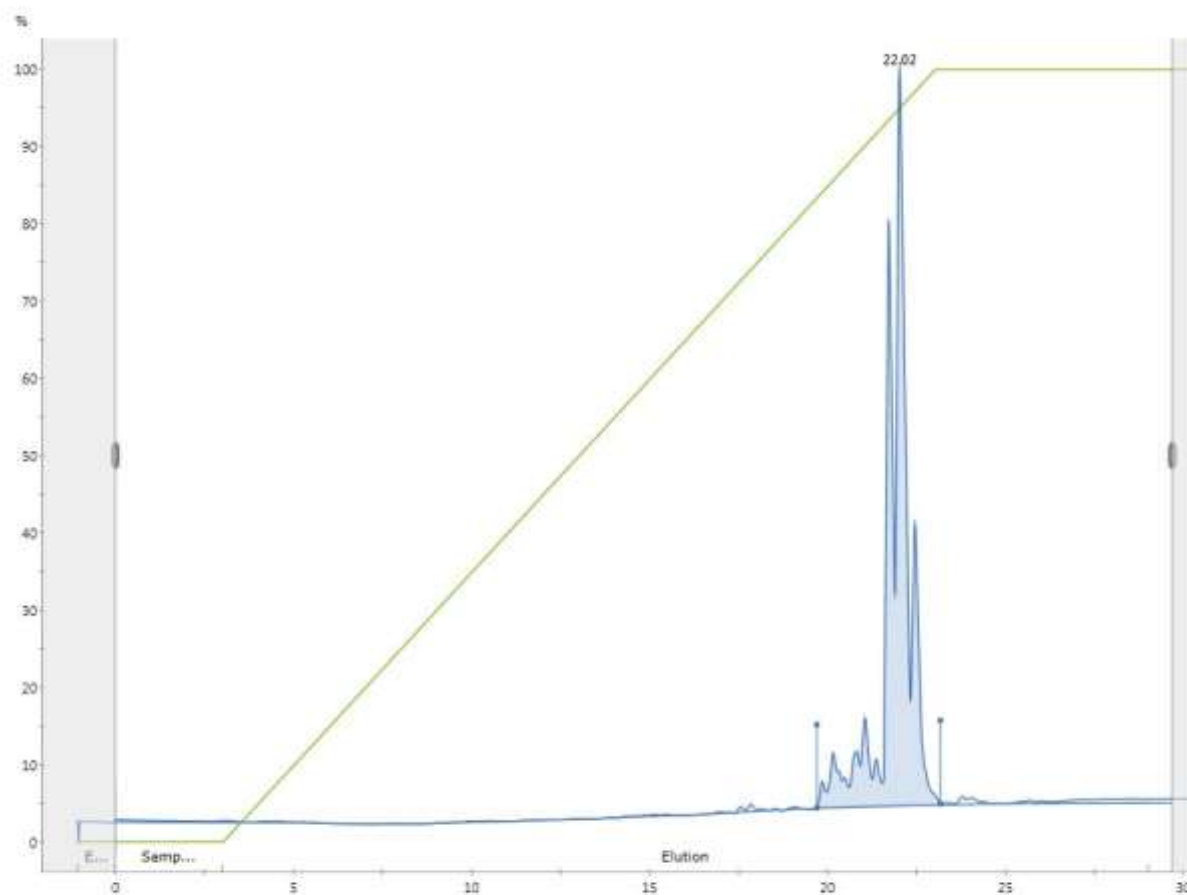

Peak Table - UV\_1\_260

| Peak   | Retention<br>min | Area<br>min <sup>2</sup> mAU | Area % | Ext coeff<br>mg ml <sup>-1</sup> cm <sup>-1</sup> |
|--------|------------------|------------------------------|--------|---------------------------------------------------|
| Peak A | 22.022           | 105.4                        | 100    |                                                   |

**Figure S18.** HPLC trace of dT<sub>3</sub>TP **4c** as a mixture of Rp and Sp stereoisomers. Peak A (100%), RT (22.0 min). (Y-Axis): Buffer A (10 mM TEAB) to 100% Buffer B (1 M TEAB).

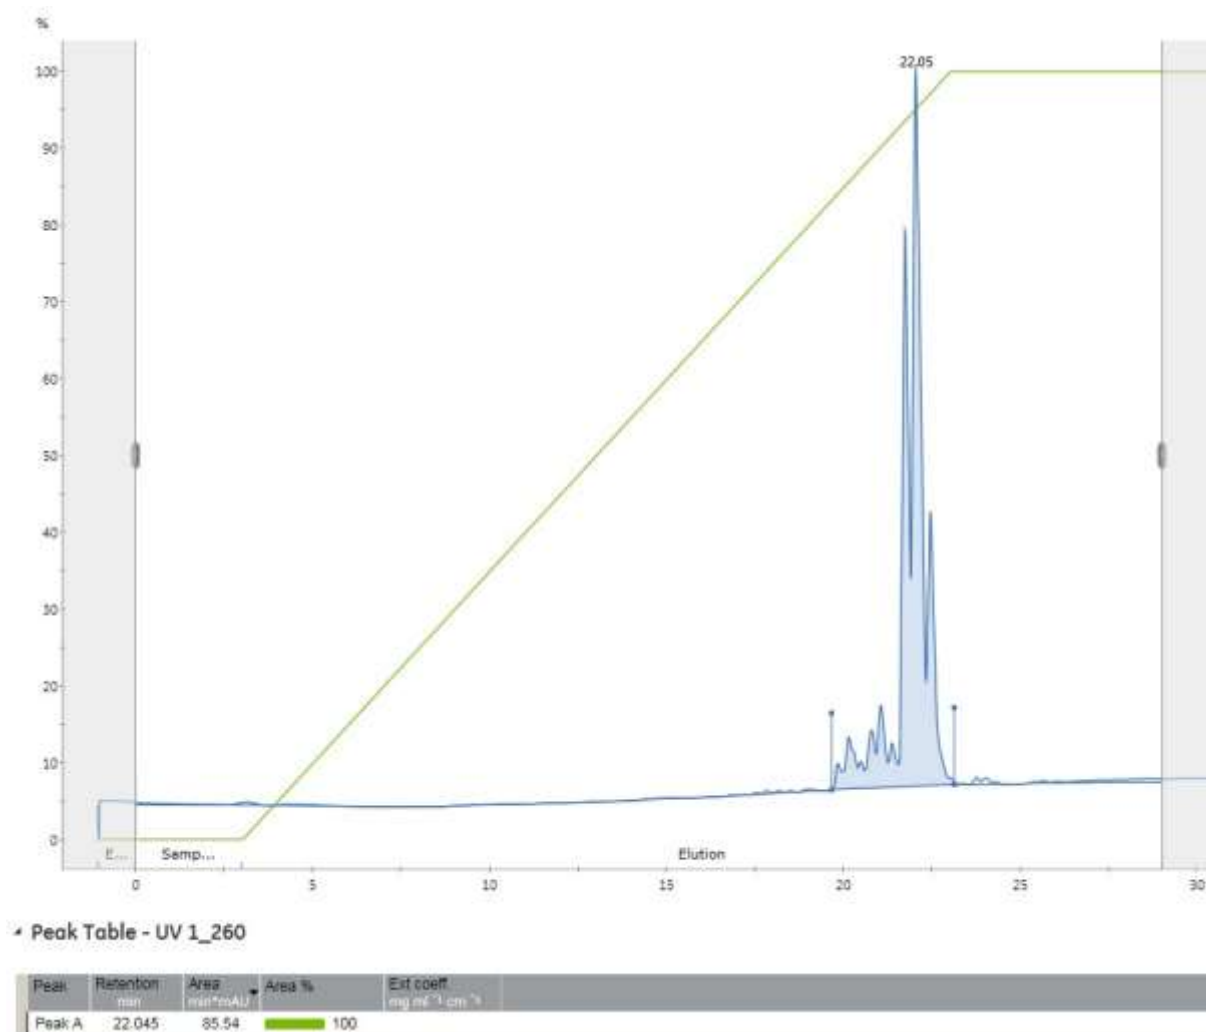

**Figure S19.** HPLC trace of crude reaction mixture (5 minutes) of dT<sub>3</sub>TP **4c**, (Klenow *exo*) polymerase and NEB2 buffer. Peak A (100%), RT (22.0 min). (Y-Axis): Buffer A (10 mM TEAB) to 100% Buffer B (1 M TEAB).

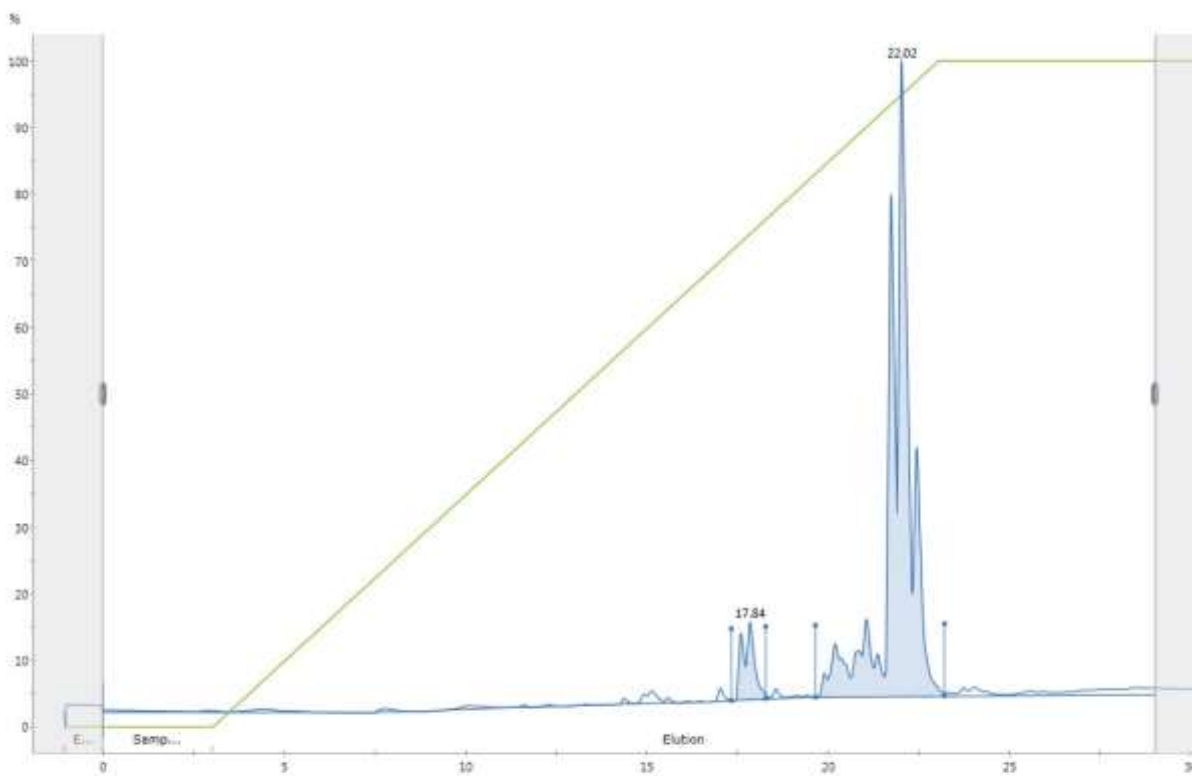

Peak Table - UV 1\_260

| Peak   | Retention<br>min | Area<br>mAU*min | Area % | Ext. coeff.<br>mAU*min*% <sup>-1</sup> |
|--------|------------------|-----------------|--------|----------------------------------------|
| Peak A | 17.835           | 8.334           | 7.27   |                                        |
| Peak B | 22.023           | 106.3           | 92.73  |                                        |

**Figure S110.** HPLC trace of crude reaction mixture (1 hour) of dT<sub>3</sub>TP **4c**, (Klenow *exo*) polymerase and NEB2 buffer. Peak A (93%), RT (22.0 min). (Y-Axis): Buffer A (10 mM TEAB) to 100% Buffer B (1 M TEAB).

## 4. LCMS analyses of enzymatic reactions

### LCMS settings and method

Chromatographic separations for LC–MS experiments were performed on a Thermo Scientific™ Vanquish™ Flex Binary UHPLC system (Thermo Fisher Scientific, Reinach, Switzerland).

The column used for all separations was a Waters Aquity Premier BEH C18 Peptide 2.1\*50 mm 1.7 µm 300A (Waters (CH) AG, Baden-Dättwil, Switzerland). The solvents were A: 15 mM Amylamine (ALDRICH, W424201 (in-house re-distilled), CAS 110-58-7, SIGMA-ALDRICH CHEMIE GMBH (CH), Buchs Switzerland) and 50 mM 1,1,1,3,3,3-HEXAFLUORO-2-PROPANOL (HFIP, ACROS ORGANICS, ACR14754 (99.5+%, PURE), CAS 920-66-1, ThermoFisher Scientific, Reinach Switzerland) in water (Milli-Q® IQ 7000, Millipore, Merck & Cie, Schaffhausen, Switzerland) and B: methanol/acetonitrile (9/1;v/v) both gradient grade. Both solvents contained 1 µM Ethylenediaminetetraacetic acid disodium salt dihydrate (EDTA), SIGMA, E5134-100G (99.0-101.0%, titration)), CAS 6381-92-6, SIGMA-ALDRICH CHEMIE GMBH (CH), Buchs Switzerland helping to suppress metal adducts forming in the mass spectrometer. A flow rate of 400 µL min<sup>-1</sup> was applied, and the column compartment was held at 80°C. The gradient system was A vs B starting at 5%B with a hold for 0.2 min before a linear raise to 45%B at 5 min followed by a 0.5 min step to 100% B for flushing the column for 1 min before coming back to the initial 5% B for reinjection.

For mass spectrometric data acquisition, a Thermo Scientific™ Fusion Lumos™ Hybrid Quadrupole-Orbitrap mass spectrometer equipped with a heated electrospray ionization-II (HESI-II) probe in a standard Thermo Scientific™ Ion Max™ ion source (Thermo Fisher Scientific, San José, CA, USA) was used. Data acquisition was performed with Thermo Scientific™ Xcalibur 4.5. HR LC–MS measurements were performed under Thermo Scientific™ Xcalibur™ Orbitrap Fusion Lumos Tune Application 3.5. The mass range was 600-2000 Da at a resolution of 120K. In addition, the full DAD but also a 260 nm UV trace were acquired.

MS raw files were exported to ThermoFisher Scientific BioPharma Finder (BPF) 5.1 software and analyzed using the Intact Mass Analysis deconvolution feature either against the full structure of the compounds or just against the molecular mass. All data evaluation was done based on the Thermo Scientific BioPharma Finder User Guide Software Version 5.1, XCALI-98492 Revision A, July 2022.

**Table SI1. Summary of PEX reactions of DNA primer P3 on DNA Template T1**

| Name                                                      | m/z calc. | m/z found              | Interpretation of the reaction products                             |
|-----------------------------------------------------------|-----------|------------------------|---------------------------------------------------------------------|
| PEX of <b>dTTP</b><br>Klenow (exo-)<br>(Positive control) | 8857,4821 | 8857,5017              | Mass of 12T additions (expected)                                    |
|                                                           | 9161,5281 | 9161,5503              | Mass of 12T+1 additions                                             |
|                                                           | 9465,5742 | 9465,5964              | Mass of 12T+2 additions                                             |
|                                                           | 9769,6202 | 9769,6468              | Mass of 12T+3 additions                                             |
| PEX of <b>4c</b><br>With <i>Taq</i>                       | 8985,2994 | 8977,3241<br>8995,3220 | Mass distribution resulted in two masses found (average 8986.3230). |
| PEX of <b>4c</b><br>With <i>Kf</i> (exo-)                 | 8985,2994 | 8977,3019<br>8995,3158 | Mass distribution resulted in two masses found (average 8986.3088). |

**Table SI2. Summary of PEX reactions of DNA primer P3 on DNA Template T2**

| Name                                                      | m/z calc.  | m/z found  | Interpretation of the reaction products             |
|-----------------------------------------------------------|------------|------------|-----------------------------------------------------|
| PEX of <b>dTTP</b><br>Klenow (exo-)<br>(Positive control) | 15035,4853 | Not found  | Mass of expected product                            |
|                                                           | 15916,6162 | 15916,5680 | Mass of expected product +CCT addition              |
|                                                           | 15940,6275 | 15940,5543 | Mass of expected product +CTA addition              |
|                                                           | 16229,6738 | 16229,6121 | Mass of expected product +CCTA addition             |
| PEX of <b>4c</b><br>With <i>Taq</i>                       | 15155,4853 | 15145,1574 | Mass distribution resulted in a slightly lower mass |
| PEX of <b>4c</b><br>With <i>Kf</i> (exo-)                 | 15155,4853 | 15145,1764 | Mass distribution resulted in a slightly lower mass |
|                                                           | 15458,2889 | 15458,2295 | Mass of expected product +T addition                |



**LCMS analysis chromatogram** of PEX reaction of DNA primer **P3** on the DNA template **T1** with **dTTP** and **Klenow (exo)** polymerase (positive control reaction)

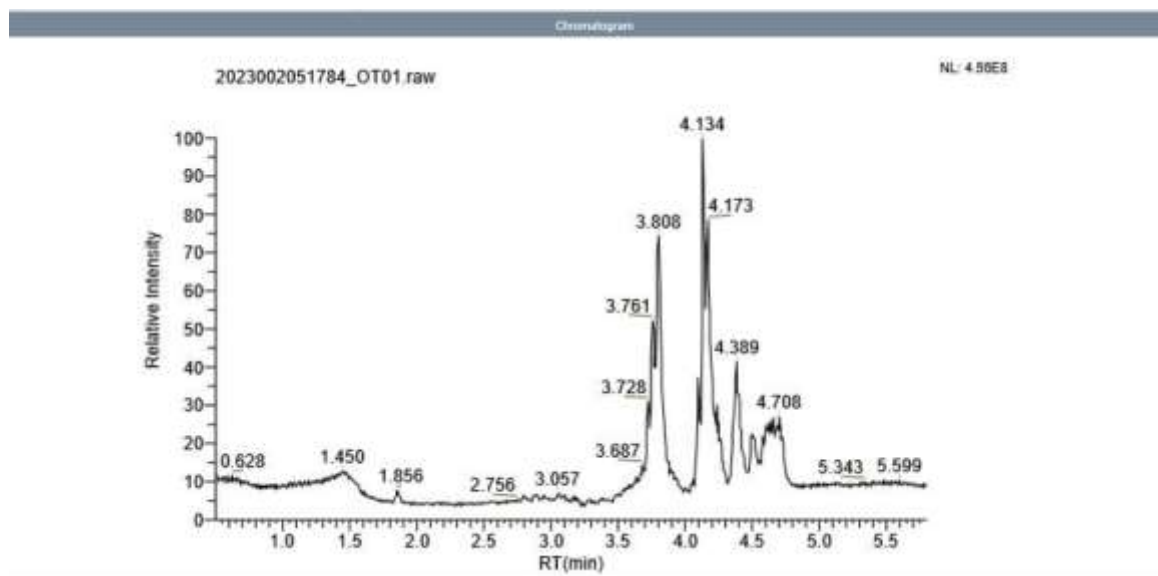

**Figure SI11.** LC chromatogram of PEX (**P3, T1, dTTP, Klenow**).

**RT (3.68-3.81)**

(Row 6, 17) - DNA template T1 (calc. 8228,4713; found 8203,4713; 8228,4637);

(Row 4) - DNA template T1 (+T addition) (calc. 8532,5173; found 8532,5261);

(Row 2) - DNA template T1 (+TT addition) (calc. 8836,5634; found 8836,5826).

**RT (4.13-4.19)**

(Row 5) - Expected DNA product (+one T addition) (calc. 9161,5281; 9161,5503);

(Row 1) - Expected DNA product (+two T additions) (calc. 9465,5742; found 9465,5964);

(Row 3) - Expected DNA product (+three T additions) (calc. 9769,6202; found 9769,6468).

| Row Number | Sequence Name | Modified (s) | Observed Ion Mass | Therory of Mass (Da) | Matched Ion Pair (Da) | Average Mass | Ion Intensity | Relative Abundance | Fractional Abundance | Number of Charge States | Charge State (m/z) | Number of Detected Ions | Delta Mass  | Scan Range | Start Time (min) | Stop Time (min) | Apex RT |
|------------|---------------|--------------|-------------------|----------------------|-----------------------|--------------|---------------|--------------------|----------------------|-------------------------|--------------------|-------------------------|-------------|------------|------------------|-----------------|---------|
| 1          |               |              | 9465.5964         | 0.00000              | 0.0                   | 9470.21      | 14619482.694  | 100.00             | 14.98                | 9                       | 5 - 13             | 21                      | 0.00000     | 586 - 616  | 4.087            | 4.287           | 4.133   |
| 2          |               |              | 8836.5826         | 0.00000              | 0.0                   | 8846.89      | 10337453.032  | 70.71              | 10.57                | 9                       | 5 - 13             | 16                      | -629.01394  | 536 - 560  | 3.748            | 3.988           | 3.814   |
| 3          |               |              | 8769.6468         | 0.00000              | 0.0                   | 8774.41      | 88640313.23   | 58.58              | 8.76                 | 9                       | 5 - 13             | 10                      | 3046.9936   | 592 - 620  | 4.127            | 4.314           | 4.187   |
| 4          |               |              | 8532.5261         | 0.00000              | 0.0                   | 8536.69      | 63766387.23   | 43.62              | 6.52                 | 8                       | 5 - 12             | 17                      | -433.07033  | 521 - 558  | 3.714            | 3.896           | 3.778   |
| 5          |               |              | 9161.5503         | 0.00000              | 0.0                   | 9166.02      | 48609862.31   | 33.25              | 4.97                 | 9                       | 5 - 13             | 17                      | -334.09608  | 580 - 607  | 4.046            | 4.227           | 4.118   |
| 6          |               |              | 8203.4713         | 0.00000              | 0.0                   | 8207.47      | 36532132.89   | 24.24              | 3.63                 | 8                       | 5 - 12             | 14                      | -1262.1286  | 527 - 548  | 3.687            | 3.828           | 3.761   |
| 7          |               |              | 1831.3964         | 0.00000              | 0.0                   | 1832.20      | 27828653.70   | 18.51              | 2.77                 | 3                       | 1 - 3              | 11                      | -7834.28996 | 261 - 270  | 1.833            | 1.933           | 1.862   |
| 8          |               |              | 11673.6824        | 0.00000              | 0.0                   | 11678.58     | 20424777.61   | 13.90              | 2.09                 | 6                       | 6 - 13             | 13                      | 608.00007   | 596 - 618  | 4.153            | 4.301           | 4.207   |
| 9          |               |              | 8836.5826         | 0.00000              | 0.0                   | 8834.80      | 16323042.64   | 11.17              | 1.67                 | 9                       | 5 - 13             | 13                      | -113.01430  | 542 - 562  | 3.788            | 3.923           | 3.841   |
| 10         |               |              | 10377.7217        | 0.00000              | 0.0                   | 10382.70     | 13318048.28   | 9.11               | 1.36                 | 9                       | 6 - 18             | 16                      | 912.22533   | 600 - 626  | 4.180            | 4.342           | 4.230   |
| 11         |               |              | 3473.3923         | 0.00000              | 0.0                   | 3478.30      | 13017858.91   | 8.90               | 1.35                 | 8                       | 3 - 7              | 22                      | -4389.70407 | 306 - 338  | 3.558            | 3.761           | 3.653   |
| 12         |               |              | 13114.1490        | 0.00000              | 0.0                   | 13120.54     | 12714201.59   | 8.70               | 1.30                 | 11                      | 7 - 17             | 13                      | 3648.55264  | 623 - 644  | 4.335            | 4.476           | 4.382   |
| 13         |               |              | 3346.5456         | 0.00000              | 0.0                   | 3348.18      | 10959565.39   | 7.58               | 1.12                 | 4                       | 2 - 5              | 14                      | -1125.05083 | 431 - 451  | 3.915            | 3.955           | 3.884   |
| 14         |               |              | 11682.7644        | 0.00000              | 0.0                   | 11686.02     | 10891819.94   | 7.45               | 1.11                 | 9                       | 6 - 18             | 15                      | 1216.04827  | 604 - 626  | 4.267            | 4.355           | 4.253   |
| 15         |               |              | 12818.0959        | 0.00000              | 0.0                   | 12816.34     | 11801933.83   | 6.88               | 1.03                 | 11                      | 7 - 17             | 13                      | 3344.49940  | 620 - 641  | 4.314            | 4.449           | 4.375   |
| 16         |               |              | 3942.5907         | 0.00000              | 0.0                   | 3943.99      | 9286285.70    | 6.29               | 0.94                 | 4                       | 2 - 5              | 14                      | -4423.09560 | 405 - 426  | 2.833            | 2.986           | 2.896   |
| 17         |               |              | 8228.4713         | 0.00000              | 0.0                   | 8232.40      | 9162801.31    | 6.27               | 0.94                 | 7                       | 5 - 11             | 11                      | -1237.13286 | 525 - 543  | 3.674            | 3.794           | 3.728   |

**LCMS analysis chromatogram** of PEX reaction of DNA primer **P3** on the DNA template **T1** with dT<sub>3</sub>TP **4c** and **Taq** polymerase

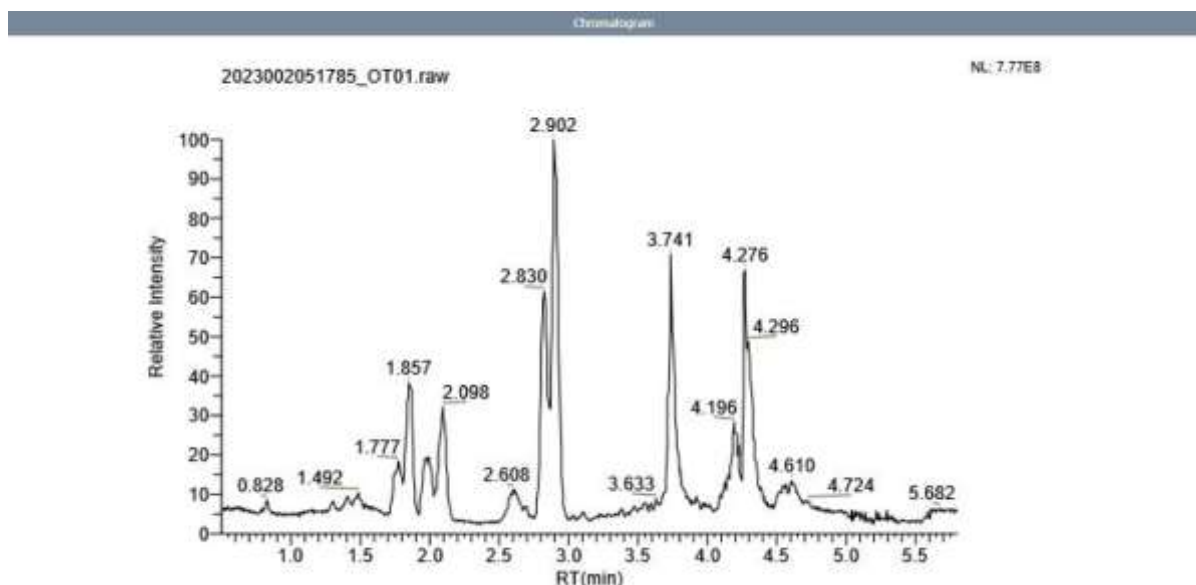

**Figure SI12.** LC chromatogram of PEX (**P3**, **T1**, dT<sub>3</sub>TP **4c**, **Taq**).

**RT (3.73-3.77)**

(Rows 4-5) - DNA template T1 (calc. 8228,4713; found 8227,4833; 8238,4777; 8252,4769).

**RT (4.28-4.33)**

(Rows 3, 8) - Expected DNA product (calc. 8985,2994; found 8977,3241; 8995,3220).

| Shrimp Window Intract Masses Table |               |              |                   |                       |                          |              |               |                    |                      |                         |                           |                              |            |            |                  |                 |            |
|------------------------------------|---------------|--------------|-------------------|-----------------------|--------------------------|--------------|---------------|--------------------|----------------------|-------------------------|---------------------------|------------------------------|------------|------------|------------------|-----------------|------------|
| Row Number                         | Sequence Name | Modification | Monoisotopic Mass | Theoretical Mass (Da) | Matched Mass Error (ppm) | Average Mass | Sum Intensity | Relative Abundance | Fractional Abundance | Number of Charge States | Charge State Distribution | Number of Detected Intervals | Delta Mass | Scan Range | Start Time (min) | Stop Time (min) | Approx. RT |
| 1                                  |               |              | 1806.25264        | 0.00000               | 0.0                      | 1811.31      | 399575633.74  | 100.00             | 17.21                | 3                       | 1 - 3                     | 22                           | 0.00000    | 259 - 292  | 1.777            | 1.997           | 1.870      |
| 2                                  |               |              | 2226.06367        | 0.00000               | 0.0                      | 2227.37      | 379713003.16  | 90.35              | 15.55                | 2                       | 2 - 3                     | 21                           | 415.81304  | 694 - 637  | 4.110            | 4.329           | 4.210      |
| 3                                  |               |              | 8977.32418        | 0.00000               | 0.0                      | 8982.35      | 161239020.46  | 52.08              | 8.96                 | 8                       | 5 - 12                    | 18                           | 7167.07144 | 622 - 650  | 4.229            | 4.415           | 4.282      |
| 4                                  |               |              | 8238.47723        | 0.00000               | 0.0                      | 8243.11      | 158468800.27  | 51.19              | 8.81                 | 7                       | 5 - 11                    | 16                           | 6428.22510 | 543 - 567  | 3.701            | 3.860           | 3.784      |
| 5                                  |               |              | 8227.48332        | 0.00000               | 0.0                      | 8232.11      | 733083402.21  | 23.70              | 4.08                 | 7                       | 5 - 11                    | 16                           | 6417.23068 | 539 - 563  | 3.674            | 3.833           | 3.734      |
| 6                                  |               |              | 2210.08662        | 0.00000               | 0.0                      | 2211.38      | 7035349636    | 22.73              | 3.91                 | 2                       | 2 - 3                     | 19                           | 399.83398  | 503 - 621  | 4.036            | 4.323           | 4.157      |
| 7                                  |               |              | 2248.04237        | 0.00000               | 0.0                      | 2249.36      | 6006742320    | 19.41              | 3.34                 | 2                       | 2 - 3                     | 15                           | 437.78973  | 605 - 628  | 4.117            | 4.269           | 4.210      |
| 8                                  |               |              | 8995.32196        | 0.00000               | 0.0                      | 9000.36      | 5129625358    | 16.57              | 2.85                 | 8                       | 5 - 12                    | 34                           | 7185.98932 | 625 - 676  | 4.249            | 4.590           | 4.302      |

**LCMS analysis chromatogram** of PEX reaction of DNA primer **P3** on the DNA template **T1** with dT<sub>3</sub>TP **4c** and **Klenow (exo)** polymerase

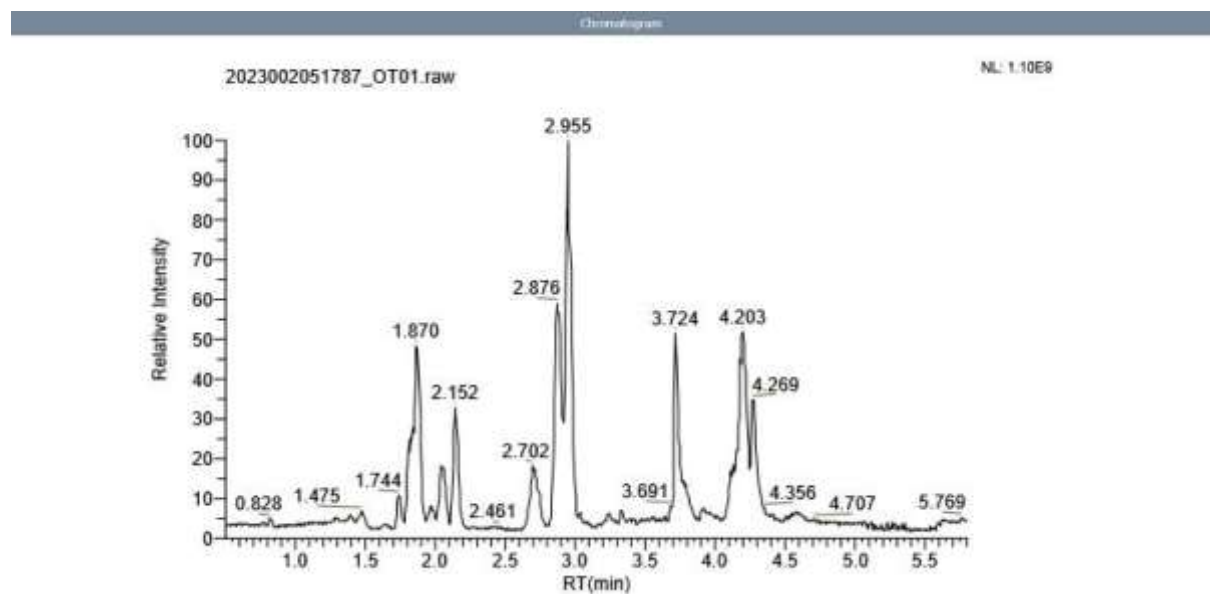

**Figure SI13.** LC chromatogram of PEX (**P3**, **T1**, dT<sub>3</sub>TP **4c**, **Klenow**).

**RT (3.71-3.73)**

(Rows 2, 4) - DNA template T1 (calc. 8228,4713; found 8227,4952; 8228,4968).

**RT (4.20-4.31)**

(Rows 3, 8) - Expected DNA product (calc. 8985,2994; found 8977,3019; 8995,3158).

| Row Number | Sequence Name | Modification | Monoisotopic Mass | Theoretical Mass (Da) | Hydrated Mass Error (ppm) | Average Mass | Sum Intensity | Relative Abundance | Fractional Abundance | Number of Charge States | Charge State Distribution | Number of Detected Ions | Delta Mass | Scan Range | Start Time (min) | Stop Time (min) | Area % |
|------------|---------------|--------------|-------------------|-----------------------|---------------------------|--------------|---------------|--------------------|----------------------|-------------------------|---------------------------|-------------------------|------------|------------|------------------|-----------------|--------|
| 1          |               |              | 1816.25160        | 0.00000               | 0.0                       | 1811.31      | 71028946.74   | 100.00             | 42.63                | 3                       | 1 - 3                     | 20                      | 0.00000    | 256 - 285  | 1.771            | 1.964           | 1.864  |
| 2          |               |              | 8227.49515        | 0.00000               | 0.0                       | 8232.12      | 13206836.82   | 18.59              | 7.93                 | 7                       | 5 - 11                    | 11                      | 6417.24354 | 537 - 563  | 3.671            | 3.843           | 3.737  |
| 3          |               |              | 8977.30152        | 0.00000               | 0.0                       | 8982.33      | 11962598.57   | 16.84              | 7.18                 | 8                       | 5 - 12                    | 19                      | 7167.05032 | 620 - 647  | 4.223            | 4.403           | 4.283  |
| 4          |               |              | 8228.49673        | 0.00000               | 0.0                       | 8233.12      | 82469766.41   | 11.51              | 4.95                 | 7                       | 5 - 11                    | 9                       | 6418.24515 | 538 - 560  | 3.677            | 3.823           | 3.710  |
| 5          |               |              | 1826.23017        | 0.00000               | 0.0                       | 1827.30      | 72287132.73   | 10.18              | 4.34                 | 3                       | 1 - 3                     | 14                      | 15.97896   | 276 - 299  | 1.903            | 2.058           | 1.977  |
| 6          |               |              | 3917.73386        | 0.00000               | 0.0                       | 3919.97      | 33489396.28   | 4.71               | 2.01                 | 5                       | 2 - 8                     | 13                      | 2107.48225 | 480 - 500  | 3.285            | 3.420           | 3.346  |
| 7          |               |              | 3371.55625        | 0.00000               | 0.0                       | 3373.52      | 32968649.47   | 4.64               | 1.98                 | 4                       | 2 - 5                     | 14                      | 1561.30465 | 436 - 457  | 2.988            | 3.129           | 3.048  |
| 8          |               |              | 8995.31580        | 0.00000               | 0.0                       | 9000.15      | 32802883.31   | 4.63               | 1.97                 | 7                       | 5 - 11                    | 29                      | 7185.06420 | 626 - 670  | 4.263            | 4.559           | 4.303  |

**LCMS analysis chromatogram** of PEX reaction of DNA primer **P3** on the DNA template **T2** with **dTTP** and **Klenow (exo)** polymerase (positive control reaction)

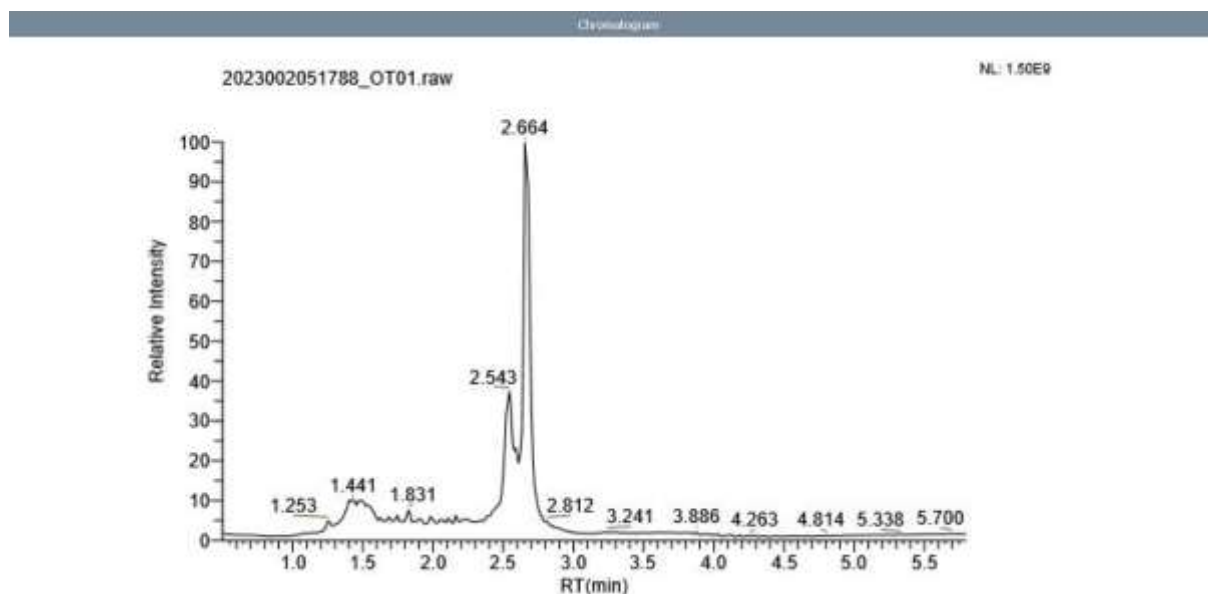

**Figure SI14.** LC chromatogram of PEX (**P3**, **T2**, **dTTP**, **Klenow**).

**RT (2.53-2.57)** – DNA template T2 (calc. 14406,4745)

(Row 6) - DNA template T2 (+GG addition) (calc. 15063,5717; found 15063,4807);

(Rows 4) - DNA template T2 (+GGT addition) (calc. 15367,6177; found 15367,5532).

**RT (2.67-2.70)** – Expected DNA product (calc. 15035,4853)

(Row 1) - Expected DNA product (+CCT addition) (calc. 15916,6162; 15916,5680);

(Row 2) - Expected DNA product (+CCTA addition) (calc. 16229,6738; found 16229,6121);

(Row 3) - Expected DNA product (+CTA addition) (calc. 15940,6275; found 15940,5543).

| Row Number | Sequence Name | Molecular Ion | Molecular Weight (Da) | Theoretical Mass (Da) | Matched Mass Error (ppm) | Average Mass | Scan Intensity | Relative Abundance | Fractional Abundance | Number of Charge States | Charge State Distribution | Number of Detected Intervals | Delta Mass  | Scan Range | Start Time (min) | Stop Time (min) | Acq. RT |
|------------|---------------|---------------|-----------------------|-----------------------|--------------------------|--------------|----------------|--------------------|----------------------|-------------------------|---------------------------|------------------------------|-------------|------------|------------------|-----------------|---------|
| 1          |               |               | 15916.5680            | 0.0000                | 0.0                      | 15924.37     | 12423663.83    | 100.00             | 18.84                | 9                       | 11 - 19                   | 5                            | 0.00000     | 196 - 207  | 2.623            | 2.771           | 2.670   |
| 2          |               |               | 16229.6120            | 0.0000                | 0.0                      | 16237.57     | 9601512.45     | 77.28              | 14.56                | 9                       | 12 - 20                   | 5                            | 313.04804   | 198 - 209  | 2.650            | 2.798           | 2.697   |
| 3          |               |               | 15940.5543            | 0.0000                | 0.0                      | 15948.30     | 6443893.55     | 51.82              | 9.77                 | 8                       | 11 - 19                   | 4                            | 23.98627    | 196 - 205  | 2.623            | 2.744           | 2.670   |
| 4          |               |               | 15367.5521            | 0.0000                | 0.0                      | 15375.09     | 4642428.21     | 37.37              | 7.04                 | 9                       | 11 - 19                   | 3                            | -549.01482  | 188 - 195  | 2.518            | 2.610           | 2.563   |
| 5          |               |               | 8082.3373             | 0.0000                | 0.0                      | 8086.30      | 3071417.98     | 29.55              | 5.57                 | 6                       | 5 - 10                    | 3                            | -7834.23064 | 156 - 163  | 2.086            | 2.180           | 2.133   |
| 6          |               |               | 15063.4807            | 0.0000                | 0.0                      | 15070.87     | 3546291.51     | 28.54              | 5.38                 | 8                       | 11 - 18                   | 3                            | -853.09738  | 186 - 193  | 2.489            | 2.583           | 2.536   |
| 7          |               |               | 8395.3969             | 0.0000                | 0.0                      | 8399.51      | 3292448.25     | 26.50              | 4.99                 | 6                       | 5 - 10                    | 4                            | -7521.17197 | 160 - 169  | 2.140            | 2.261           | 2.187   |
| 8          |               |               | 15925.5450            | 0.0000                | 0.0                      | 15933.35     | 2700078.84     | 21.79              | 4.11                 | 5                       | 14 - 18                   | 3                            | 8.97789     | 196 - 205  | 2.623            | 2.744           | 2.697   |
| 9          |               |               | 8724.4387             | 0.0000                | 0.0                      | 8728.71      | 2234311.02     | 17.98              | 3.39                 | 6                       | 5 - 10                    | 4                            | -7192.12932 | 162 - 171  | 2.167            | 2.287           | 2.214   |
| 10         |               |               | 9953.4902             | 0.0000                | 0.0                      | 9957.92      | 2188133.11     | 17.81              | 3.32                 | 8                       | 8 - 11                    | 4                            | -8603.07777 | 166 - 175  | 2.220            | 2.341           | 2.267   |

**LCMS analysis chromatogram** of PEX reaction of DNA primer **P3** on the DNA template **T2** with dT<sub>3</sub>TP **4c** and **Taq** polymerase

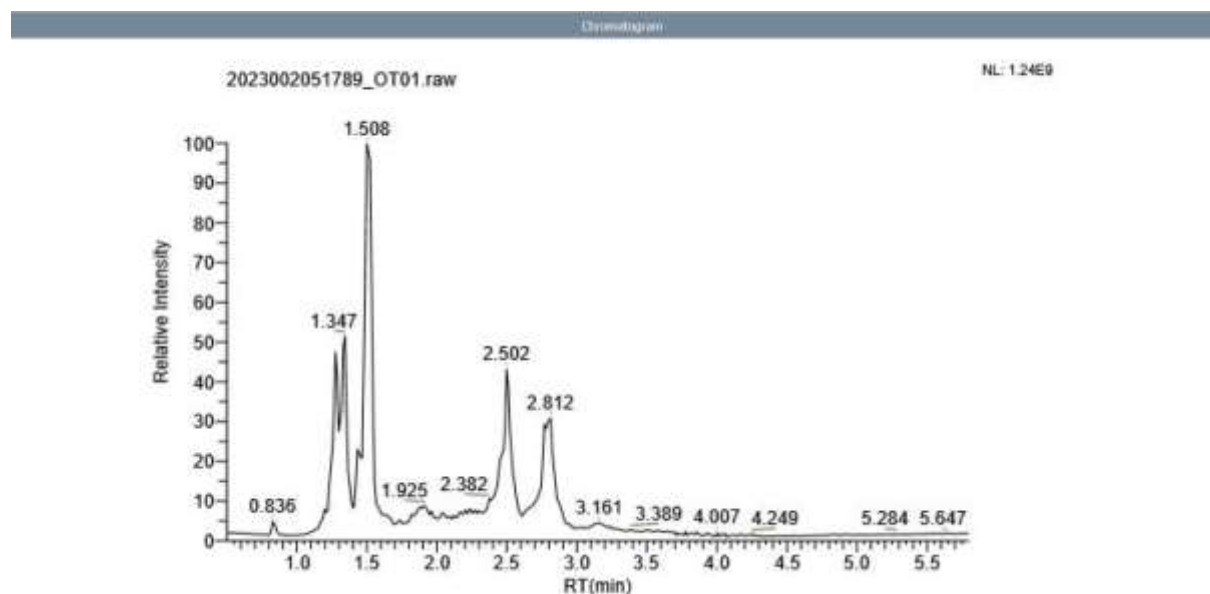

**Figure SI15.** LC chromatogram of PEX (**P3**, **T2**, dT<sub>3</sub>TP **4c**, **Taq**).

**RT (2.48-2.51)** – DNA template T2 (calc. 14406,4745)

(Row 5) - DNA template T2 (+G addition) (calc. 14735,5270; found 14775,4430);

(Row 1) - DNA template T2 (+GGA addition) (calc. 15377,6371; found 15385,5663).

**RT (2.77-2.83)**

(Row 3) - Expected DNA product (calc. 15155,4853; found 15145,1574);

(Row 2) - Expected DNA product (+T\*T\*T addition) (calc. 16099,3431; found 16084,3163).

| Row Number | Sequence Name | Modification | Monitored Ion   | Theoretical Mass (Da) | Measured Mass Error (ppm) | Average Mass | Scan Intensity | Relative Abundance | Fractional Abundance | Number of Charge States | Charge State Distribution | Number of Detected Isotopes | Delta Mass      | Scan Range | Start Time (min) | Stop Time (min) | Area (%) |
|------------|---------------|--------------|-----------------|-----------------------|---------------------------|--------------|----------------|--------------------|----------------------|-------------------------|---------------------------|-----------------------------|-----------------|------------|------------------|-----------------|----------|
| 1          |               |              | 15385.56<br>632 | 0.00000               | 0.0                       | 15393.11     | 13045123<br>00 | 100.00             | 26.75                | 10                      | 10 - 19                   | 4                           | 0.00000         | 184 - 193  | 2.462            | 2.583           | 2.509    |
| 2          |               |              | 16084.31<br>628 | 0.00000               | 0.0                       | 16092.20     | 9349394<br>64  | 67.53              | 18.07                | 10                      | 10 - 19                   | 11                          | 608.7400<br>6   | 206 - 239  | 2.758            | 3.201           | 2.832    |
| 3          |               |              | 15145.15<br>743 | 0.00000               | 0.0                       | 15152.59     | 7703906<br>26  | 55.64              | 14.89                | 9                       | 10 - 18                   | 4                           | -240.408<br>89  | 204 - 213  | 2.731            | 2.852           | 2.778    |
| 4          |               |              | 16082.331<br>18 | 0.00000               | 0.0                       | 16086.29     | 3013177<br>63  | 21.76              | 5.82                 | 6                       | 5 - 10                    | 3                           | -2303.23<br>515 | 160 - 167  | 2.140            | 2.234           | 2.187    |
| 5          |               |              | 14775.44<br>302 | 0.00000               | 0.0                       | 14782.60     | 2153464<br>28  | 15.55              | 4.16                 | 8                       | 10 - 17                   | 3                           | -610.123<br>30  | 182 - 189  | 2.435            | 2.529           | 2.482    |
| 6          |               |              | 16053.484<br>84 | 0.00000               | 0.0                       | 16057.92     | 1925518<br>56  | 13.91              | 3.72                 | 6                       | 6 - 11                    | 3                           | -6332.08<br>140 | 168 - 175  | 2.247            | 2.341           | 2.294    |
| 7          |               |              | 16724.444<br>94 | 0.00000               | 0.0                       | 16728.71     | 1833368<br>59  | 13.24              | 3.54                 | 8                       | 5 - 10                    | 3                           | -6661.12<br>229 | 106 - 173  | 2.220            | 2.334           | 2.267    |
| 8          |               |              | 16016.172<br>51 | 0.00000               | 0.0                       | 16020.45     | 1850075<br>69  | 11.92              | 3.19                 | 6                       | 5 - 10                    | 3                           | -7069.19<br>382 | 160 - 167  | 2.140            | 2.234           | 2.187    |
| 9          |               |              | 16065.545<br>90 | 0.00000               | 0.0                       | 16071.13     | 1519765<br>76  | 10.98              | 3.04                 | 6                       | 6 - 11                    | 3                           | -6019.02<br>043 | 170 - 177  | 2.274            | 2.368           | 2.321    |
| 10         |               |              | 16074.480<br>96 | 0.00000               | 0.0                       | 16078.88     | 1385710<br>95  | 10.01              | 2.68                 | 6                       | 6 - 11                    | 3                           | -6411.98<br>026 | 166 - 173  | 2.220            | 2.334           | 2.267    |



**LCMS analysis chromatogram** of PEX reaction of DNA primer **P3** on the DNA template **T2** with dT<sub>3</sub>TP **4c** and Klenow (*exo*) polymerase

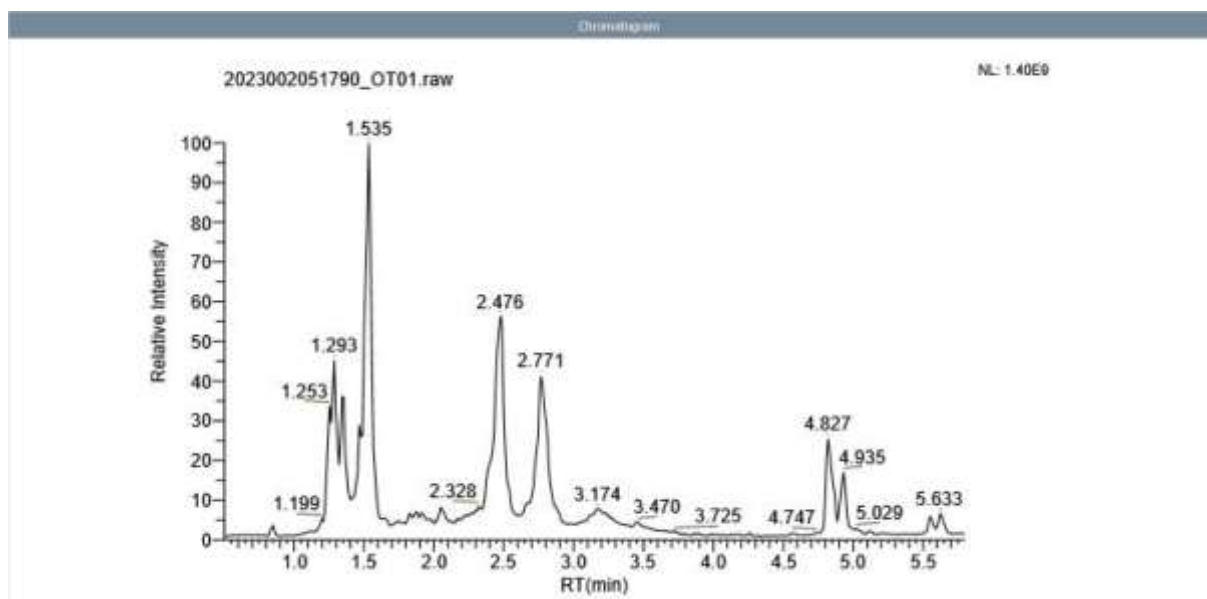

**Figure SI16.** LC chromatogram of PEX (**P3, T2, dT<sub>3</sub>TP 4c, Klenow**).

**RT (2.47-2.49)**

(Row 3) - DNA template T2 (calc. 14406,4745; found 14446,3894);

(Row 1) - DNA template T2 (+G addition) (calc. 14735,5270; found 14759,4390).

**RT (2.77-2.80)**

(Row 2) - Expected DNA product (calc. 15155,4853; found 15145,1764);

(Row 6) - Expected DNA product (+T addition) (calc. 15458,2889; found 15458,2295).

| Row Number | Sequence Name | ModSum (rt) | Monoisot. Mass (Da) | Theoretical Mass (Da) | Matched Mass (ppm) | Average Mass | Sum Intensity | Relative Abundance | Fractional Abundance | Number of Charge States | Charge State Distribution | Number of Defunct Intervals | Delta Mass  | Scan Range | Start Time (min) | Stop Time (min) | Apex RT |
|------------|---------------|-------------|---------------------|-----------------------|--------------------|--------------|---------------|--------------------|----------------------|-------------------------|---------------------------|-----------------------------|-------------|------------|------------------|-----------------|---------|
| 1          |               |             | 14758.43895         | 0.00000               | 0.0                | 14768.88     | 11802501.00   | 100.00             | 19.76                | 9                       | 9 - 18                    | 4                           | 0.00000     | 182 - 191  | 2.435            | 2.556           | 2.482   |
| 2          |               |             | 15145.17641         | 0.00000               | 0.0                | 15152.60     | 11727078.52   | 99.36              | 19.63                | 9                       | 10 - 18                   | 4                           | 385.73743   | 204 - 213  | 2.731            | 2.852           | 2.778   |
| 3          |               |             | 14446.38941         | 0.00000               | 0.0                | 14453.48     | 6762909.96    | 57.30              | 11.32                | 9                       | 10 - 18                   | 3                           | -313.04957  | 182 - 189  | 2.435            | 2.528           | 2.482   |
| 4          |               |             | 14831.14357         | 0.00000               | 0.0                | 14838.42     | 3791840.63    | 32.13              | 6.35                 | 9                       | 10 - 18                   | 3                           | 71.70459    | 202 - 209  | 2.704            | 2.798           | 2.751   |
| 5          |               |             | 8882.33449          | 0.00000               | 0.0                | 8886.30      | 3246475.47    | 27.51              | 5.44                 | 6                       | 5 - 10                    | 4                           | -4677.10449 | 160 - 169  | 2.140            | 2.261           | 2.187   |
| 6          |               |             | 15458.22952         | 0.00000               | 0.0                | 15465.80     | 3070778.79    | 26.02              | 5.14                 | 7                       | 12 - 18                   | 3                           | 698.79954   | 206 - 213  | 2.758            | 2.852           | 2.805   |
| 7          |               |             | 8395.39575          | 0.00000               | 0.0                | 8398.51      | 2474969.85    | 20.67              | 4.68                 | 6                       | 5 - 10                    | 3                           | -6364.04323 | 164 - 171  | 2.194            | 2.288           | 2.241   |
| 8          |               |             | 9653.48079          | 0.00000               | 0.0                | 9657.92      | 2065420.41    | 17.50              | 3.46                 | 6                       | 6 - 11                    | 3                           | -5705.95119 | 168 - 175  | 2.247            | 2.341           | 2.294   |
| 9          |               |             | 8724.44436          | 0.00000               | 0.0                | 8728.71      | 1883296.14    | 15.96              | 3.15                 | 6                       | 5 - 10                    | 3                           | -6034.99482 | 166 - 173  | 2.228            | 2.314           | 2.267   |
| 10         |               |             | 8348.38094          | 0.00000               | 0.0                | 8352.47      | 1866387.11    | 15.81              | 3.12                 | 6                       | 5 - 10                    | 3                           | -5411.05804 | 160 - 167  | 2.140            | 2.234           | 2.187   |
